# Supplementary material
Source: PubMed Central journal article supplement (PMC8440210)
Supplement: 41380_2020_744_MOESM1_ESM.pdf [file 41380_2020_744_MOESM1_ESM.pdf]

**The gut microbiome modulates gut-brain axis glycerophospholipid metabolism  
in a region-specific manner in a non-human primate model of depression**

*Peng Zheng, Jing Wu, Hanping Zhang, Seth W. Perry, Bangmin Yin, Xunmin Tan, Tingjia Chai,  
Weiwei Liang, Yu Huang, Yifan Li, Jiajia Duan, Ma-Li Wong, Julio Licinio and Peng Xie*

**SUPPLEMENTAL MATERIALS**

**Supplemental Methods**

**Animal information**

The animal experiments were performed as described previously<sup>1-3</sup>. Briefly, healthy and depression-like *M. fascicularis* animals were maintained at the Zhongke Experimental Animal Co., Ltd. (hereinafter “the company”), Suzhou, P.R.C. The company imported macaques from Guangdong and Vietnam in 1990, and provided them standard breeding and domestication conditions, including sufficient nutrition, daily cleanings and regular veterinary care. Macaques were reared in standard enclosures; each enclosure contains 16 to 24 macaques, 2 of which are male.

The protocol for selecting animals displaying naturally-occurring depression-like behaviors was as previously described<sup>1</sup>. Briefly, we surveyed the populations from 20 enclosures, and identified 6 typical depressive-like (DL) and 6 corresponding healthy control (HC) monkeys. All the 12 identified macaques were adult female, and were ruled out for disease by veterinary examination. Clinical samples are always used to uncover the association between gut microbiome and depression. Such investigations have the following shortcomings: (i) Postmortem brain tissues of patients with depression are limited, and are not suitable for uncovering how gut microbiome shapes the brain through gut-brain axis; (ii) the gut microbiome may be inevitably influenced by some confounding factors such as dietary habits, genetic, and environmental factors. By contrast, due to fixed living environment and diet, as well as highly similar genetic background, DL monkey paradigm is a useful model for uncovering the role of gut microbiome in the depression onset.

**Behavioral observation**

All the behavioral observations were videotaped and analyzed by NOLDUS Observer XT software (version 10.0, Noldus Information Tech Technology, Leesburg, PA). Behavioral videos were collected from January 2018 to August 2018 by 5 trained observers. To identify the DL monkeys, 6 typical DL behaviors were compared using both "free enclosures test" and "social interaction test". All the 12 identified macaques were adult female, and were ruled out for disease by veterinary examination. In every monkey cage, there were two male and 10-20 female macaques. Over time, a social hierarchy formed with one alpha and one beta male, and female *monkeys* of various rank, similarly to what happens in the wild. After a few years, some subordinate females display depression-like behaviors as they continuously suffer from the social stresses imposed by their subordinate status. For example, depression-like macaques are often the last to eat, are more socially and spatially isolated, and are actively discouraged from approaching the dominant male by the other animals<sup>4</sup>. As detailed elsewhere herein, these DL macaques have some characteristics, not unlike those of human depression. Thus, it serves as a highly useful new animal model for untangling the role of the microbiome in MDD.

**Free enclosures test:** All the DL and HC monkeys were observed within their native enclosures, and all activities were performed spontaneously without human interference. Five typical DL behaviors, including ingestion, amicable, huddle, sit alone, and locomotion, were recorded. The video records were collected for 20-30 min per shoot, with 6-7 replicates over 3 days.

**Social interaction test:** We designed a monkey social interaction test to evaluate communication activity in macaques based on previous behavioral models<sup>5, 6</sup>. Here, we used two adjacent single cages (transparent partitions) which were 70 cm long, 80 cm wide, and 90 cm high. During this experiment, a male macaque was placed in one cage, and then a female macaque was placed in another cage. The female macaque crossing the center line of her cage was defined as communication behavior. The whole process was video recorded, 30 min per shoot, 2 repeats for each macaque.

**Macaque tissue preparation:** Animals were deeply anesthetized and euthanized, whole brains were removed, immediately frozen in liquid nitrogen and cut in coronal

sections<sup>7, 8</sup>. The prefrontal cortex, hippocampus and amygdala were dissected according to a macaque brain atlas<sup>9, 10</sup>, and stored at -80 °C until use. Peripheral tissues were dissected (liver and intestine) and blood were also collected and processed. Fecal samples were obtained from the cecum. Peripheral tissues and samples were then stored at -80 °C until use.

### **DNA extraction, PCR amplification, and Illumina MiSeq/HiSeq sequencing**

16S rRNA gene amplicon library preparation and sequencing were performed as described previously<sup>11, 12</sup>. Briefly, we extracted microbial DNA from macaque fecal samples with the E.Z.N.A. soil DNA Kit (Omega Bio-tek, Norcross, GA, U.S.). Bacterial primers 338F (5'-ACTCCTACGGGAGGCAGCAG-3') and 806R (5'-GGACTACHVGGGTWTCTAAT-3') were designed to amplify the V3-V4 region of the bacterial 16S rRNA gene<sup>13</sup>. The PCR reaction was performed in triplicates. The amplicons were extracted using agarose gels, purified using the AxyPrep DNA Gel Extraction Kit (Axygen Biosciences, Union City, CA), and quantified using QuantiFluor™-ST (Promega, Madison, WI, USA) following the manufacturer's instructions. Then, paired-end sequencing was performed on the Illumina MiSeq platform (Illumina, San Diego, CA, USA) according to standard protocols.

The metagenomic libraries were prepared and sequenced according to our previous protocols<sup>12, 14</sup>. Briefly, we extracted microbial DNA from 12 macaque fecal collections using the E.Z.N.A. Stool DNA Kit (Omega Bio-tek, Norcross, GA, USA). The DNA extract was sheared using Covaris M220, aimed insert size was about 300 bp. Paired-end library was constructed using TruSeq™ DNA Sample Prep Kit (Illumina). Then, the amplicons library was paired-end sequenced on an Illumina HiSeq X platform<sup>15</sup>.

### **Comparisons of Metabolite Profiles from the *M. fascicularis***

Details of the metabonomic methods were similar to our previously published protocols<sup>12, 14</sup>. Briefly, peripheral and brain tissue samples were prepared by homogenization, dissociation, and centrifugation, and serum samples were collected

and centrifuged twice<sup>12</sup>. The gas chromatography-mass spectrometry (GC/MS) three-dimensional matrices comprised of peak indices (RT-m/z pairs), sample names (observations), and normalized peak area percentages were imported into SIMCA-P 11.0 (Umetrics, Umeå, Sweden). The liquid chromatography-mass spectrometry (LC/MS) data were collected in both positive and negative ESI (electrospray ionization) modes. Discrimination of metabolites between DL and HC samples was analyzed and visualized using partial least squares discriminant analysis (PLS-DA)<sup>16</sup>. The differential metabolites responsible for discrimination between the two groups were identified on SIMCA, with the significance threshold of variable importance plot (VIP) > 1.0 and P-values <0.05.

### **Weighted gene co-expression network analysis (WGCNA)**

WGCNA was used to identify key phenotype-related metagenomic and metabolic modules based on correlation patterns<sup>17</sup>. WGCNA was performed using R packages ‘WGCNA’ and ‘vegan’, along with official tutorials (<https://horvath.genetics.ucla.edu>). To describe the MGB metabolic network features comprehensively, we integrated peripheral and central metabolites into a scale-free network topology, and normalized the abundance with logarithmic conversion and robust quantile normalization. We used a ‘step-by-step network construction’ for metabolic network topology, adjusted network type to a ‘signed hybrid’ and soft thresholding power to 9 for the best topological overlap matrix, and kept other parameters as default. Considering the size of metagenomic data, we used the ‘block-wise network construction’ strategy and set 6 blocks. Metagenomic modules were identified with default parameters. Height cut of the metabolic and metagenomic dynamic trees were set to 0.25 consistently, and the modules with similar expression profiles were merged, then final the co-expression modules were determined.

## REFERENCES

1. Li X, Xu F, Xie L, Ji Y, Cheng K, Zhou Q *et al.* Depression-Like Behavioral Phenotypes by Social and Social Plus Visual Isolation in the Adult Female *Macaca fascicularis*. *PLoS one* 2013; **8**(9): : e73293.
2. Xu F, Xie L, Li X, Li Q, Wang T, Ji Y *et al.* Construction and Validation of a Systematic Ethogram of *Macaca fascicularis* in a Free Enclosure. *PLoS one* 2012; **7**(5): e37486.
3. Xu F, Wu Q, Xie L, Gong W, Zhang J, Zheng P *et al.* Macaques exhibit a naturally-occurring depression similar to humans. *Scientific reports* 2015; **5**: 9220.
4. Sapolsky RM. The influence of social hierarchy on primate health. *Science* 2005; **308**(5722): 648-652.
5. Nagahara N, Nagano M, Ito T, Shimamura K, Akimoto T, Suzuki H. Antioxidant enzyme, 3-mercaptopyruvate sulfurtransferase-knockout mice exhibit increased anxiety-like behaviors: a model for human mercaptolactate-cysteine disulfiduria. *Scientific reports* 2013; **3**: 1986.
6. Yang M, Silverman JL, Crawley JN. Automated Three-Chambered Social Approach Task for Mice. *Current protocols in neuroscience* 2011; **56**(1): 8.26.21-28.26.16.
7. Dijkman K, Sombroek CC, Vervenne RAW, Hofman SO, Boot C, Remarque EJ *et al.* Prevention of tuberculosis infection and disease by local BCG in repeatedly exposed rhesus macaques. *Nature medicine* 2019; **25**(2): 255-262.
8. Sorrells SF, Paredes MF, Cebrian-Silla A, Sandoval K, Qi D, Kelley KW *et al.* Human hippocampal neurogenesis drops sharply in children to undetectable levels in adults. *Nature* 2018; **555**(7696): 377-381.
9. Saleem KS, Logothetis NK. *A combined MRI and histology atlas of the rhesus monkey brain in stereotaxic coordinates*. Academic Press 2012.
10. (1991-present) B. NeuroMaps. <http://braininfopr.washington.edu/> 2016.
11. Zheng P, Li Y, Wu J, Zhang H, Huang Y, Tan X *et al.* Perturbed Microbial Ecology in Myasthenia Gravis: Evidence from the Gut Microbiome and Fecal Metabolome. *Advanced Science* 2019: 1901441.
12. Zheng P, Zeng B, Zhou C, Liu M, Fang Z, Xu X *et al.* Gut microbiome remodeling induces depressive-like behaviors through a pathway mediated by the host's metabolism. *Molecular psychiatry* 2016; **21**(6): 786-796.
13. Bruce-Keller AJ, Salbaum JM, Luo M, Blanchard E, Taylor CM, Welsh DA *et al.* Obese-type Gut Microbiota Induce Neurobehavioral Changes in the Absence of Obesity. *Biological psychiatry* 2015; **77**(7): 607-615.
14. Zheng P, Zeng B, Liu M, Chen J, Pan J, Han Y *et al.* The gut microbiome from patients with schizophrenia modulates the glutamate-glutamine-GABA cycle and schizophrenia-relevant behaviors in mice. *Science advances* 2019; **5**(2): eaau8317.
15. Ugurel S, Schrama D, Keller G, Schadendorf D, Brocker EB, Houben R *et al.* Impact of the CCR5 gene polymorphism on the survival of metastatic melanoma patients receiving immunotherapy. *Cancer immunology, immunotherapy : CII* 2008; **57**(5): 685-691.
16. Bradley W, Steven H, Robert P. Utilities for quantifying separation in PCA/PLS-DA scores plots. *Analytical Biochemistry* 2013; **433**(2): 102-104.
17. Langfelder P, Horvath S. WGCNA: an R package for weighted correlation network analysis. *BMC bioinformatics* 2008; **9**: 559.

## **Supplemental Figures**

Sup Fig.1. The differences of microbial composition between depressive-like (DL) and healthy control (HC) macaques.

Sup Fig.2. Metagenomic characteristics of depressive-like (DL) *M. fascicularis*.

Sup Fig.3. Comparison of metabolic signatures in depressive-like (DL) and healthy control (HC) macaques.

Sup Fig.4. Shared metabolites among different tissues.

## Sup Fig. 1

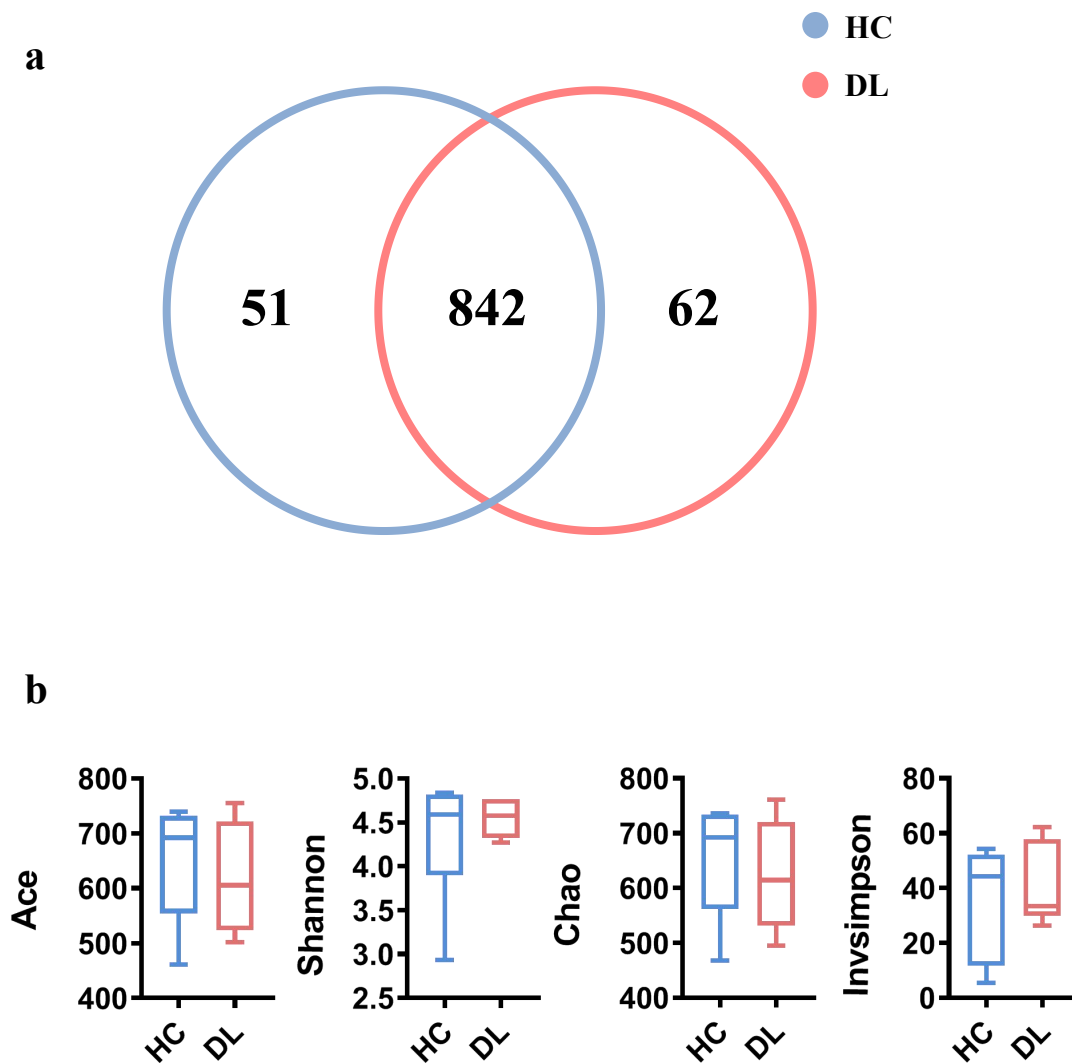

**Sup Fig. 1. The differences of microbial composition between depressive-like (DL) and healthy control (HC) macaques. (a)** A Venn diagram showed that 842 of 955 OTUs were common to the two groups, while 51 and 62 OTUs were unique to HCs and DLs, respectively. **(b)**  $\alpha$ -phylogenetic diversity analysis showed no significant differences between DL and HC macaques in four indices (ACE, Chao, Shannon, and Invsimpson).

## Sup Fig. 2

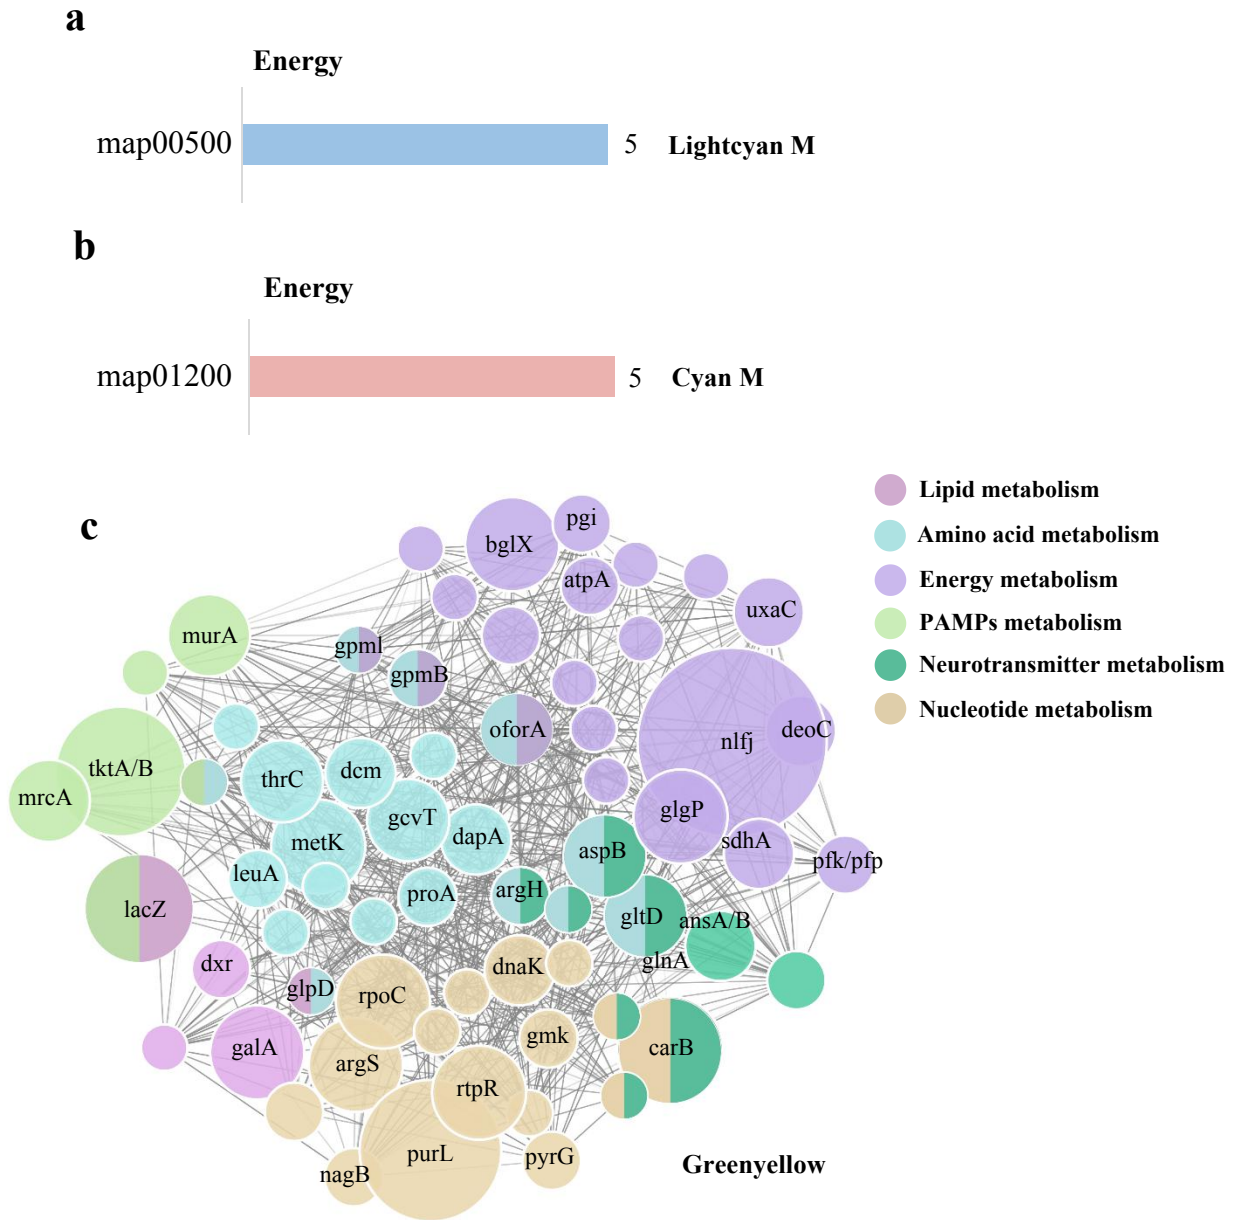

**Sup Fig.2. Metagenomic characteristics of depressive-like (DL) *M. fascicularis*.** Totally, we identified three metagenomic WGCNA modules which were significantly linked with depressive behaviors. (a-b) The two metagenomic WGCNA modules (Lightcyan M or Cyan M ) were also linked with energy metabolism. (c) Microbial genes in the Greenyellow module mainly belonged to energy, neurotransmitter, nucleotide, PAMP, and lipid metabolism pathways. In the network diagram of the Greenyellow module, nodules indicating the annotated KEGG ECs, the nodule colors indicating shared bio-functional categories among the ECs, and the nodule sizes indicating the number of genes hits in each EC.



### Sup Fig. 3

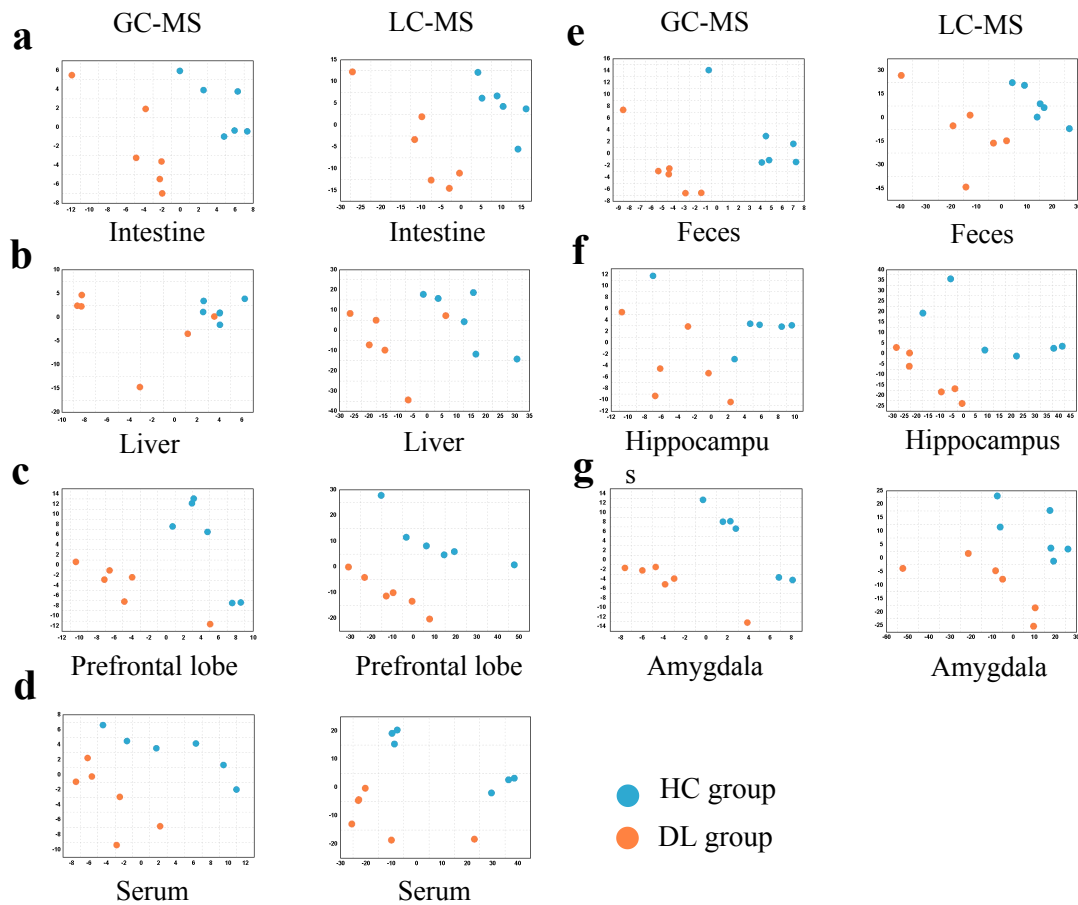

**Sup Fig.3. Comparison of metabolic signatures in depressive-like (DL) and healthy control (HC) macaques.** Comparative metabolomic analyses of samples obtained from feces, intestine, liver, serum, prefrontal lobe, hippocampus, and amygdala from DL and HC macaques were performed. Both gas chromatography and liquid mass spectrometry were used to characterize the metabolic alterations in the two groups. In these detected metabolites, the metabolic signatures of the DL group were significantly different from that of the control group across all tissues analyzed.

### Sup Fig. 4

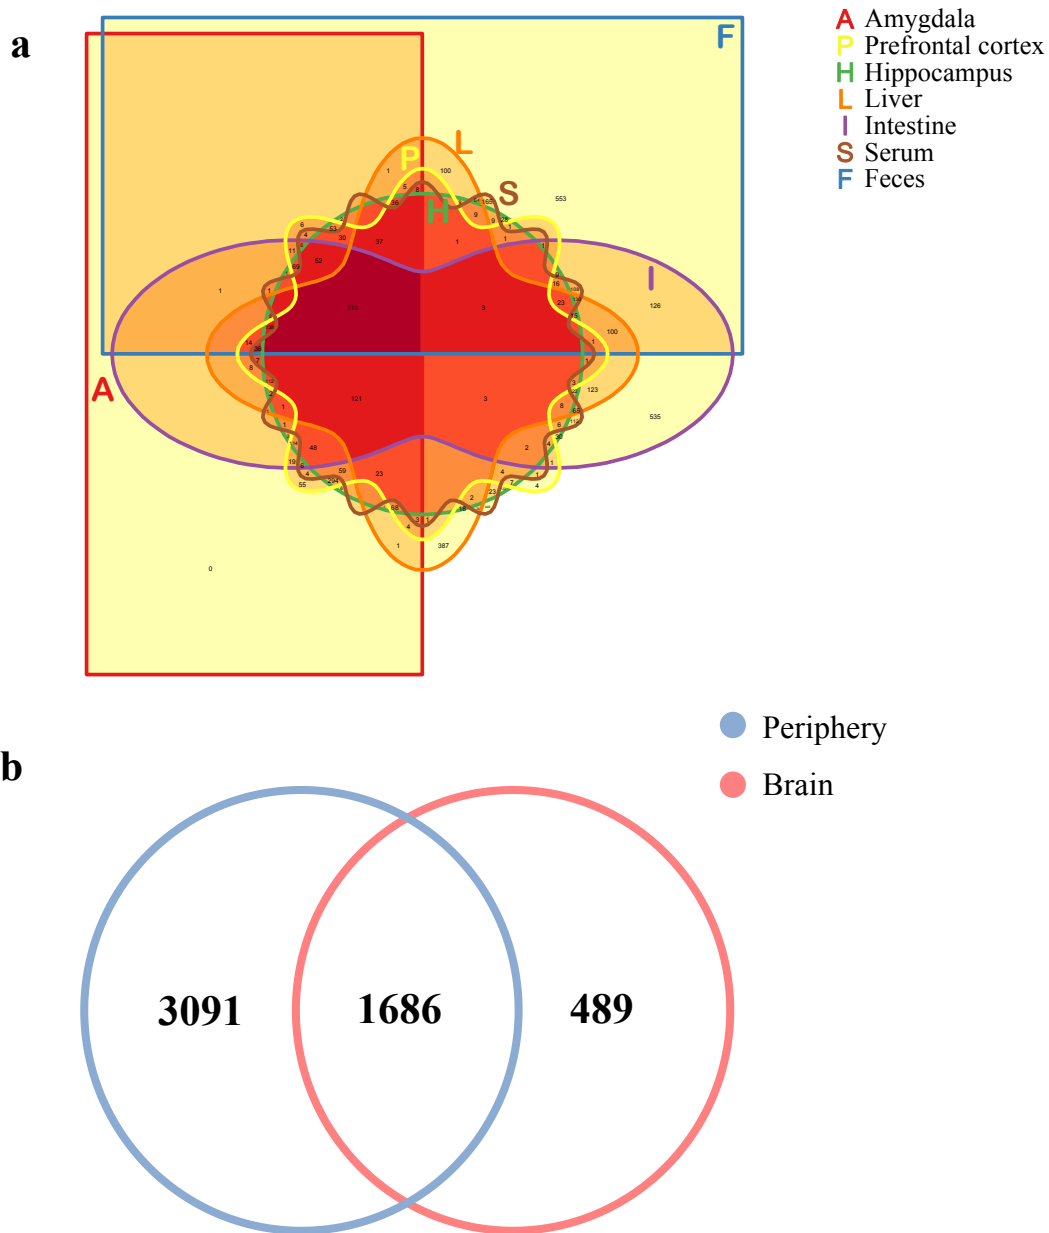

**Sup Fig. 4. Shared metabolites among different tissues. (a)** Venn diagram of shared metabolites among different tissues. The samples of MGB axis were diverse, these detected samples shared only a limited number of metabolites. **(b)** Venn diagram of the total number of shared metabolites between peripheral tissues (feces, serum, intestine, and liver) and brain tissues (amygdala, prefrontal cortex, and hippocampus).

## **Supplemental Tables**

**Sup Table 1.** Depressive phenotypes of enrolled *Macaca fascicularis* samples

**Sup Table 2.** Linear discriminant analysis showing the key microbes attributing to distinguish DLs from HCs

**Sup Table 3a.** Gene count in metagenomic WGCNA modules.

**Sup Table 3b.** Detailed information of cyan module in metagenomic modules.

**Sup Table 3c.** Detailed information of greenyellow module in metagenomic modules

**Sup Table 3d.** Detailed information of lightcyan module in metagenomic modules

**Sup Table 4a.** Metabolomic analysis of intestinal samples obtained from DL and HC groups.

**Sup Table 4b.** Metabolomic analysis of serum samples obtained from DL and HC groups.

**Sup Table 4c.** Metabolomic analysis of hippocampus samples obtained from DL and HC groups.

**Sup Table 4d.** Metabolomic analysis of feces samples obtained from DL and HC groups.

**Sup Table 4e.** Metabolomic analysis of liver samples obtained from DL and HC groups.

**Sup Table 4f.** Metabolomic analysis of prefrontal cortex samples obtained from DL and HC groups.

**Sup Table 4g.** Metabolomic analysis of amygdala samples obtained from DL and HC groups.

**Sup Table 5a.** Metabolite count in metabolomic WGCNA modules.

**Sup Table 5b.** Detailed information of 4 metabolic modules.

[Sup Tables below]

**Sup Table 1. Depressive phenotypes of enrolled *Macaca fascicularis* samples**

| Sample ID | Group | behavioral duration |            |           |           |             |                         |
|-----------|-------|---------------------|------------|-----------|-----------|-------------|-------------------------|
|           |       | huddle (s)          | locomotion | ingestion | alone sit | amicable    | communication with male |
| A         | DL    | 381.0506            | 69.49278   | 89.02778  | 901.7811  | 194.0472222 | 24.35                   |
| B         | DL    | 227.4022            | 113.5222   | 20.47722  | 1046.494  | 95.975      | 12.13                   |
| C         | DL    | 198.825             | 45.4185    | 58.343    | 1009.506  | 138.4975    | 40.21                   |
| D         | HC    | 0.555556            | 338.555    | 25.405    | 30.36167  | 173.7233333 | 136.67                  |
| E         | HC    | 0                   | 427.7263   | 34.79632  | 41.99789  | 190.3426316 | 604.86                  |
| F         | HC    | 0                   | 466.5658   | 39.27947  | 57.67263  | 147.7289474 | 494.51                  |
| G         | DL    | 148.785             | 65.82389   | 32.01056  | 943.6622  | 31.975      | 52.17                   |
| H         | DL    | 97.74722            | 52.17222   | 15.60611  | 736.9989  | 47.30555556 | 17.54                   |
| I         | DL    | 123.1933            | 109.7033   | 27.13111  | 858.4689  | 40.34555556 | 22.44                   |
| J         | HC    | 0.111111            | 516.9639   | 58.75889  | 5.418889  | 142.5838889 | 540.8                   |
| K         | HC    | 1.119444            | 389.5806   | 108.1694  | 10.99444  | 83.50222222 | 180.17                  |
| L         | HC    | 1.902778            | 367.5811   | 79.17167  | 7.237222  | 98.24166667 | 334.61                  |

**Sup Table 2. Linear discriminant analysis showing the key microbes attributing to distinguish DLs from HCs**

| OTU ID | Taxonomic Assignment                                                                                                                                                 | Relative Abundance in DL (%) |      | Relative Abundance in HC (%) |      | P value | DL Relative to HCs |
|--------|----------------------------------------------------------------------------------------------------------------------------------------------------------------------|------------------------------|------|------------------------------|------|---------|--------------------|
|        |                                                                                                                                                                      | MEAN                         | SEM  | MEAN                         | SEM  |         |                    |
| OTU857 | p__Cyanobacteria;c__Cyanobacteria;o__norank_c__Cyanobacteria;f__norank_c__Cyanobacteria;g__norank_c__Cyanobacteria;s__Vitis_vinifera_subsp__caucasica                | 0.92                         | 0.15 | 0.85                         | 0.33 | 0.04    | UP                 |
| OTU222 | p__Firmicutes;c__Erysipelotrichia;o__Erysipelotrichales;f__Erysipelotrichaceae;g__Erysipelotrichaceae_UCG-004;s__uncultured_bacterium_g__Erysipelotrichaceae_UCG-004 | 0.57                         | 0.21 | 0.00                         | 0.00 | 0.02    | UP                 |
| OTU115 | p__Firmicutes;c__Negativicutes;o__Selenomonadales;f__Veillonellaceae;g__Anaerovibrio;s__uncultured_bacterium_g__Anaerovibrio                                         | 5.41                         | 1.91 | 1.42                         | 0.55 | 0.02    | UP                 |
| OTU827 | p__Firmicutes;c__Negativicutes;o__Selenomonadales;f__Veillonellaceae;g__Megasphaera;s__uncultured_bacterium_g__Megasphaera                                           | 0.39                         | 0.18 | 0.00                         | 0.00 | 0.02    | UP                 |
| OTU389 | p__Firmicutes;c__Negativicutes;o__Selenomonadales;f__Veillonellaceae;g__Mitsuokella;s__uncultured_bacterium_g__Mitsuokella                                           | 2.84                         | 1.22 | 0.25                         | 0.10 | 0.04    | UP                 |
| OTU190 | p__Firmicutes;c__Negativicutes;o__Selenomonadales;f__Veillonellaceae;g__Allisonella;s__uncultured_bacterium_g__Allisonella                                           | 0.65                         | 0.31 | 0.14                         | 0.10 | 0.05    | UP                 |
| OTU173 | p__Firmicutes;c__Negativicutes;o__Selenomonadales;f__Veillonellaceae;g__Mitsuokella;s__unclassified_g__Mitsuokella                                                   | 4.31                         | 2.28 | 0.19                         | 0.13 | 0.05    | UP                 |
| OTU591 | p__Firmicutes;c__Negativicutes;o__Selenomonadales;f__Acidaminococcaceae;g__Acidaminococcus;s__uncultured_bacterium_g__Acidaminococcus                                | 2.51                         | 1.45 | 0.04                         | 0.04 | 0.05    | UP                 |
| OTU890 | p__Firmicutes;c__Clostridia;o__Clostridiales;f__Lachnospiraceae;g__Lachnospira;s__unclassified_g__Lachnospira                                                        | 0.70                         | 0.19 | 0.12                         | 0.05 | 0.01    | UP                 |
| OTU495 | p__Firmicutes;c__Clostridia;o__Clostridiales;f__Lachnospiraceae;g__Lachnospira;s__uncultured_bacterium_g__Lachnospira                                                | 3.34                         | 1.28 | 1.05                         | 0.37 | 0.04    | UP                 |

|        |                                                                                                                                                      |       |      |       |       |      |      |
|--------|------------------------------------------------------------------------------------------------------------------------------------------------------|-------|------|-------|-------|------|------|
| OTU812 | p_Firmicutes;c_Clostridia;o_Clostridiales;f_Lachnospiraceae;g_Blautia;s_Ruminococcus_sp._5_1_39BF<br>AA                                              | 41.35 | 7.35 | 29.86 | 6.35  | 0.04 | UP   |
| OTU481 | p_Firmicutes;c_Clostridia;o_Clostridiales;f_Lachnospiraceae;g_[Eubacterium]_eligens_group;s_uncultured_bacterium_g_[Eubacterium]_eligens_group       | 11.90 | 4.29 | 3.00  | 1.06  | 0.02 | UP   |
| OTU917 | p_Firmicutes;c_Clostridia;o_Clostridiales;f_Lachnospiraceae;g_Blautia;s_Blautia_obeum                                                                | 22.35 | 3.51 | 18.29 | 4.17  | 0.02 | UP   |
| OTU189 | p_Firmicutes;c_Clostridia;o_Clostridiales;f_Ruminococcaceae;g_Ruminiclostridium_9;s_uncultured_Clostridia_bacterium_g_Ruminiclostridium_9            | 0.88  | 0.22 | 0.69  | 0.28  | 0.02 | UP   |
| OTU123 | p_Firmicutes;c_Clostridia;o_Clostridiales;f_Ruminococcaceae;g_Ruminococcaceae_UCG-014;s_unclassified_g_Ruminococcaceae_UCG-014                       | 0.06  | 0.03 | 0.44  | 0.13  | 0.03 | DOWN |
| OTU394 | p_Firmicutes;c_Clostridia;o_Clostridiales;f_Ruminococcaceae;g_Ruminococcaceae_UCG-010;s_unclassified_g_Ruminococcaceae_UCG-010                       | 0.00  | 0.00 | 0.25  | 0.09  | 0.02 | DOWN |
| OTU754 | p_Firmicutes;c_Clostridia;o_Clostridiales;f_Ruminococcaceae;g_Ruminococcaceae_UCG-014;s_unclassified_g_Ruminococcaceae_UCG-014                       | 0.40  | 0.26 | 4.84  | 3.41  | 0.02 | DOWN |
| OTU669 | p_Firmicutes;c_Clostridia;o_Clostridiales;f_Ruminococcaceae;g_Ruminococcaceae_UCG-013;s_uncultured_Clostridiales_bacterium_g_Ruminococcaceae_UCG-013 | 0.10  | 0.08 | 1.01  | 0.41  | 0.05 | DOWN |
| OTU3   | p_Firmicutes;c_Clostridia;o_Clostridiales;f_Ruminococcaceae;g_Ruminococcaceae_UCG-014;s_unclassified_g_Ruminococcaceae_UCG-014                       | 0.08  | 0.08 | 1.10  | 0.53  | 0.03 | DOWN |
| OTU998 | p_Firmicutes;c_Bacilli;o_Lactobacillales;f_Streptococcaceae;g_Streptococcus;s_unclassified_g_Streptococcus                                           | 0.32  | 0.15 | 16.93 | 14.13 | 0.04 | DOWN |
| OTU984 | p_Firmicutes;c_Bacilli;o_Lactobacillales;f_Streptococcaceae;g_Streptococcus;s_unclassified_g_Streptococcus                                           | 0.06  | 0.03 | 2.13  | 0.91  | 0.04 | DOWN |
| OTU350 | p_Firmicutes;c_Bacilli;o_Lactobacillales;f_Carnobacteriaceae;g_Granulicatella;s_unclassified_g_Granulicatella                                        | 0.06  | 0.05 | 1.40  | 1.04  | 0.05 | DOWN |
| OTU660 | p_Firmicutes;c_Bacilli;o_Lactobacillales;f_Aerococcaceae;g_Abiotrophia;s_uncultured_bacterium_g_Abiotrophia                                          | 0.00  | 0.00 | 0.38  | 0.30  | 0.02 | DOWN |
| OTU981 | p_Firmicutes;c_Bacilli;o_Bacillales;f_Family_XI_o_Bacillales;g_Gemella;s_unclassified_g_Gemella                                                      | 0.13  | 0.07 | 2.11  | 0.85  | 0.04 | DOWN |

|        |                                                                                                                                                     |      |      |       |      |       |      |
|--------|-----------------------------------------------------------------------------------------------------------------------------------------------------|------|------|-------|------|-------|------|
| OTU164 | p__Firmicutes;c__Clostridia;o__Clostridiales;f__Defluviitaleaceae;g__Defluviitaleaceae_UCG-011;s__uncultured_bacterium_g__Defluviitaleaceae_UCG-011 | 0.02 | 0.02 | 0.19  | 0.07 | 0.05  | DOWN |
| OTU125 | p__Firmicutes;c__Clostridia;o__Clostridiales;f__unclassified_o__Clostridiales;g__unclassified_o__Clostridiales;s__unclassified_o__Clostridiales     | 0.05 | 0.05 | 0.38  | 0.15 | 0.05  | DOWN |
| OTU651 | p__Bacteroidetes;c__Bacteroidia;o__Bacteroidales;f__Prevotellaceae;g__Prevotella_7;s__unclassified_g__Prevotella_7                                  | 0.01 | 0.01 | 0.41  | 0.18 | 0.05  | DOWN |
| OTU758 | p__Proteobacteria;c__Epsilonproteobacteria;o__Campylobacterales;f__Helicobacteraceae;g__Helicobacter;s__Helicobacter_macacae                        | 0.60 | 0.28 | 12.52 | 5.17 | <0.01 | DOWN |

**Sup Table 3a. Gene count in metagenomic WGCNA modules.**

| Module       | n.Genes |
|--------------|---------|
| black        | 18661   |
| blue         | 29983   |
| brown        | 23739   |
| cyan         | 1465    |
| green        | 22087   |
| greenyellow  | 7919    |
| grey60       | 1054    |
| lightcyan    | 1260    |
| lightgreen   | 963     |
| magenta      | 9677    |
| midnightblue | 1443    |
| pink         | 18508   |
| purple       | 9258    |
| red          | 20456   |
| salmon       | 3154    |
| tan          | 6494    |
| turquoise    | 32198   |
| yellow       | 22549   |



**Sup Table 3b. Detailed information of cyan module in metagenomic modules.**

| Pathway ID | Pathway name                                               | KO     | Enzyme     | Hit genes |
|------------|------------------------------------------------------------|--------|------------|-----------|
| map01212   | Fatty acid metabolism                                      | K00059 | fabG       | 1         |
| map01212   | Fatty acid metabolism                                      | K00645 | fabD       | 1         |
| map01212   | Fatty acid metabolism                                      | K01897 | ACSL       | 3         |
| map01212   | Fatty acid metabolism                                      | K01962 | accA       | 1         |
| map00061   | Fatty acid biosynthesis                                    | K00059 | fabG       | 1         |
| map00061   | Fatty acid biosynthesis                                    | K00645 | fabD       | 1         |
| map00061   | Fatty acid biosynthesis                                    | K01897 | ACSL       | 3         |
| map00061   | Fatty acid biosynthesis                                    | K01962 | accA       | 1         |
| map00561   | Glycerolipid metabolism                                    | K00864 | glpK       | 1         |
| map00561   | Glycerolipid metabolism                                    | K07407 | E3.2.1.22B | 1         |
| map00561   | Glycerolipid metabolism                                    | K11529 | gck        | 1         |
| map00564   | Glycerophospholipid metabolism                             | K00057 | gpsA       | 3         |
| map00564   | Glycerophospholipid metabolism                             | K00096 | araM       | 1         |
| map00600   | Sphingolipid metabolism                                    | K01190 | lacZ       | 1         |
| map00600   | Sphingolipid metabolism                                    | K07407 | E3.2.1.22B | 1         |
| map00603   | Glycosphingolipid biosynthesis - globo and isoglobo series | K07407 | E3.2.1.22B | 1         |
| map00071   | Fatty acid degradation                                     | K01897 | ACSL       | 3         |

**Sup Table 3c. Detailed information of greenyellow module in metagenomic modules**

| Pathway ID | Pathway name                   | KO     | Enzyme     | Hit genes |
|------------|--------------------------------|--------|------------|-----------|
| map00564   | Glycerophospholipid metabolism | K00057 | gpsA       | 3         |
| map00564   | Glycerophospholipid metabolism | K00111 | glpA       | 5         |
| map00564   | Glycerophospholipid metabolism | K00655 | plsC       | 4         |
| map00564   | Glycerophospholipid metabolism | K00981 | E2.7.7.41  | 2         |
| map00564   | Glycerophospholipid metabolism | K00995 | pgsA       | 1         |
| map00564   | Glycerophospholipid metabolism | K01126 | E3.1.4.46  | 4         |
| map00564   | Glycerophospholipid metabolism | K01613 | psd        | 2         |
| map00564   | Glycerophospholipid metabolism | K03735 | eutB       | 1         |
| map00564   | Glycerophospholipid metabolism | K04019 | eutA       | 1         |
| map00564   | Glycerophospholipid metabolism | K06131 | clsA_B     | 4         |
| map00564   | Glycerophospholipid metabolism | K08591 | plsY       | 4         |
| map00561   | Glycerolipid metabolism        | K00005 | gldA       | 2         |
| map00561   | Glycerolipid metabolism        | K00128 | ALDH       | 1         |
| map00561   | Glycerolipid metabolism        | K00655 | plsC       | 4         |
| map00561   | Glycerolipid metabolism        | K00864 | glpK       | 3         |
| map00561   | Glycerolipid metabolism        | K00865 | glxK       | 1         |
| map00561   | Glycerolipid metabolism        | K03429 | ugtP       | 1         |
| map00561   | Glycerolipid metabolism        | K03621 | plsX       | 3         |
| map00561   | Glycerolipid metabolism        | K05878 | dhaK       | 2         |
| map00561   | Glycerolipid metabolism        | K07406 | melA       | 1         |
| map00561   | Glycerolipid metabolism        | K07407 | E3.2.1.22B | 9         |
| map00561   | Glycerolipid metabolism        | K08591 | plsY       | 4         |

|          |                         |        |           |   |
|----------|-------------------------|--------|-----------|---|
| map01212 | Fatty acid metabolism   | K00059 | fabG      | 2 |
| map01212 | Fatty acid metabolism   | K00248 | ACADS     | 2 |
| map01212 | Fatty acid metabolism   | K00626 | E2.3.1.9  | 1 |
| map01212 | Fatty acid metabolism   | K00645 | fabD      | 1 |
| map01212 | Fatty acid metabolism   | K00648 | fabH      | 1 |
| map01212 | Fatty acid metabolism   | K01897 | ACSL      | 5 |
| map01212 | Fatty acid metabolism   | K01961 | accC      | 2 |
| map01212 | Fatty acid metabolism   | K01962 | accA      | 1 |
| map01212 | Fatty acid metabolism   | K02371 | fabK      | 1 |
| map01212 | Fatty acid metabolism   | K09458 | fabF      | 1 |
| map01212 | Fatty acid metabolism   | K16363 | lpxC-fabZ | 1 |
| map00061 | Fatty acid biosynthesis | K00059 | fabG      | 2 |
| map00061 | Fatty acid biosynthesis | K00645 | fabD      | 1 |
| map00061 | Fatty acid biosynthesis | K00648 | fabH      | 1 |
| map00061 | Fatty acid biosynthesis | K01897 | ACSL      | 5 |
| map00061 | Fatty acid biosynthesis | K01961 | accC      | 2 |
| map00061 | Fatty acid biosynthesis | K01962 | accA      | 1 |
| map00061 | Fatty acid biosynthesis | K02371 | fabK      | 1 |
| map00061 | Fatty acid biosynthesis | K09458 | fabF      | 1 |
| map00061 | Fatty acid biosynthesis | K16363 | lpxC-fabZ | 1 |
| map00071 | Fatty acid degradation  | K00128 | ALDH      | 1 |
| map00071 | Fatty acid degradation  | K00248 | ACADS     | 2 |
| map00071 | Fatty acid degradation  | K00626 | E2.3.1.9  | 1 |
| map00071 | Fatty acid degradation  | K01897 | ACSL      | 5 |
| map00071 | Fatty acid degradation  | K04072 | adhE      | 1 |

|          |                                                            |        |            |    |
|----------|------------------------------------------------------------|--------|------------|----|
| map00603 | Glycosphingolipid biosynthesis - globo and isoglobo series | K07406 | meIA       | 1  |
| map00603 | Glycosphingolipid biosynthesis - globo and isoglobo series | K07407 | E3.2.1.22B | 9  |
| map00603 | Glycosphingolipid biosynthesis - globo and isoglobo series | K12373 | HEXA_B     | 4  |
| map00600 | Sphingolipid metabolism                                    | K01190 | lacZ       | 10 |
| map00600 | Sphingolipid metabolism                                    | K07406 | meIA       | 1  |
| map00600 | Sphingolipid metabolism                                    | K07407 | E3.2.1.22B | 9  |
| map00604 | Glycosphingolipid biosynthesis - ganglio series            | K12373 | HEXA_B     | 4  |

**Sup Table 3d. Detailed information of lightcyan module in metagenomic modules**

| Pathway ID | Pathway name                                               | KO     | Enzyme | Hit genes |
|------------|------------------------------------------------------------|--------|--------|-----------|
| map01212   | Fatty acid metabolism                                      | K00645 | fabD   | 1         |
| map01212   | Fatty acid metabolism                                      | K00647 | fabB   | 1         |
| map01212   | Fatty acid metabolism                                      | K01897 | ACSL   | 1         |
| map01212   | Fatty acid metabolism                                      | K01963 | accD   | 1         |
| map00604   | Glycosphingolipid biosynthesis - ganglio series            | K12373 | HEXA_B | 1         |
| map00603   | Glycosphingolipid biosynthesis - globo and isoglobo series | K12373 | HEXA_B | 1         |
| map00600   | Sphingolipid metabolism                                    | K01190 | lacZ   | 2         |
| map00600   | Sphingolipid metabolism                                    | K01201 | GBA    | 1         |
| map00564   | Glycerophospholipid metabolism                             | K00111 | glpA   | 2         |
| map00564   | Glycerophospholipid metabolism                             | K03735 | eutB   | 1         |
| map00564   | Glycerophospholipid metabolism                             | K08591 | plsY   | 1         |
| map00564   | Glycerophospholipid metabolism                             | K08744 | CRLS   | 1         |
| map00561   | Glycerolipid metabolism                                    | K00005 | gldA   | 1         |
| map00561   | Glycerolipid metabolism                                    | K00864 | glpK   | 3         |
| map00561   | Glycerolipid metabolism                                    | K00865 | glxK   | 2         |
| map00561   | Glycerolipid metabolism                                    | K08591 | plsY   | 1         |
| map00071   | Fatty acid degradation                                     | K01897 | ACSL   | 1         |
| map00071   | Fatty acid degradation                                     | K13953 | adhP   | 1         |
| map00071   | Fatty acid degradation                                     | K13954 | viaY   | 1         |
| map00061   | Fatty acid biosynthesis                                    | K00645 | fabD   | 1         |
| map00061   | Fatty acid biosynthesis                                    | K00647 | fabB   | 1         |
| map00061   | Fatty acid biosynthesis                                    | K01897 | ACSL   | 1         |

|          |                         |        |      |   |
|----------|-------------------------|--------|------|---|
| map00061 | Fatty acid biosynthesis | K01963 | accD | 1 |
|----------|-------------------------|--------|------|---|

**Sup Table 4a. Metabolomic analysis of intestine samples obtained from DL and HC groups.**

| Platform | Metabolites                                                                                                      | Relative Abundance in DL monkeys |             | Relative Abundance in HC monkeys |             | P value  | DL/CON      |
|----------|------------------------------------------------------------------------------------------------------------------|----------------------------------|-------------|----------------------------------|-------------|----------|-------------|
| GC/LC    | Name                                                                                                             | MEAN                             | Std         | MEAN                             | Std         |          | UP/DOW<br>M |
| LC       | (23S)-1alpha-hydroxy-25,27-didehydrovitamin D3 26,23-lactone                                                     | 5.904490452                      | 0.199372131 | 5.411252267                      | 0.268862172 | 0.004772 | Up          |
| LC       | 11,15-Dimethyltrtriacontane                                                                                      | 6.59744949                       | 1.574253093 | 4.036752403                      | 2.239617509 | 0.044918 | Up          |
| LC       | 11-Methylhexacosane                                                                                              | 7.587834515                      | 0.676961132 | 6.812572045                      | 0.232353028 | 0.036917 | Up          |
| LC       | 12,13-Dimethyl-5,14-dioxabicyclo[9.2.1]-tetradeca-1(13),11-dien-4-one                                            | 4.240793305                      | 0.572560035 | 3.006258341                      | 1.098525013 | 0.034784 | Up          |
| LC       | 12beta,16beta,20R-trihydroxy-cholest-1,4-dien-3-one                                                              | 5.362588435                      | 0.319694933 | 6.32338101                       | 0.513756359 | 0.003013 | Down        |
| LC       | 13,14-dihydroxy-docosanoic acid                                                                                  | 3.672523791                      | 0.529281869 | 2.630852501                      | 0.638035545 | 0.011682 | Up          |
| LC       | 13-keto-9Z,11E,15Z-octadecatrienoic acid                                                                         | 8.53048377                       | 0.063578454 | 8.689904171                      | 0.132477606 | 0.024003 | Down        |
| LC       | 13-tetradecen-2,4-diyn-1-ol                                                                                      | 3.629154908                      | 0.134152766 | 3.831333211                      | 0.172588041 | 0.046925 | Down        |
| LC       | 14-methyl-8-hexadecen-1-ol                                                                                       | 9.209180614                      | 0.628632429 | 7.67084665                       | 1.311959852 | 0.026943 | Up          |
| LC       | 14-O-(beta-D-glucopyranosyl)-7S,14R-dihydroxy-7,9,13,17-tetramethyl-2E,4E,8E,10E,12E,16E-octadecaheptaenoic acid | 6.063761354                      | 1.096804679 | 5.010033564                      | 0.3607128   | 0.04938  | Up          |
| LC       | 15-HETE-DA                                                                                                       | 3.672195384                      | 1.15257187  | 1.297910793                      | 1.8519658   | 0.023648 | Up          |
| LC       | 16,16-dimethyl-PGE1                                                                                              | -.661807767                      | 4.019602302 | 5.316566095                      | 3.305637985 | 0.018354 | Down        |
| LC       | 19,20-DiHDP A                                                                                                    | 1.503773268                      | 0.379303877 | 0.668291382                      | 0.741220932 | 0.0338   | Up          |
| LC       | 1-Methylhistamine                                                                                                | 3.234384262                      | 0.591254757 | 2.482279629                      | 0.417126914 | 0.029061 | Up          |
| LC       | 1-Octacosene                                                                                                     | 5.391334045                      | 0.076898989 | 5.542399721                      | 0.146752685 | 0.049554 | Down        |
| LC       | 2,6,8,12-Tetramethyl-2,4-tridecadien-1-ol                                                                        | 7.379141192                      | 0.301655338 | 7.977766815                      | 0.331812282 | 0.008432 | Down        |
| LC       | 24:3(15Z,18Z,21Z)                                                                                                | 5.585404551                      | 0.198208717 | 5.188635418                      | 0.351737045 | 0.036859 | Up          |
| LC       | 24-Nor-5beta-chole-22-ene-3alpha,7alpha,12alpha-triol                                                            | 3.236001149                      | 0.506306741 | 2.612069442                      | 0.333689993 | 0.030367 | Up          |

|    |                                                                        |             |             |             |             |          |      |
|----|------------------------------------------------------------------------|-------------|-------------|-------------|-------------|----------|------|
| LC | 26:5(11Z,14Z,17Z,20Z,23Z)                                              | 5.072771047 | 0.279791738 | 4.355016072 | 0.61445458  | 0.026309 | Up   |
| LC | 2-aminomuconic acid semialdehyde                                       | 4.051580745 | 0.302461538 | 3.476910709 | 0.444429923 | 0.025666 | Up   |
| LC | 2-deoxy-20-hydroxy-5alpha-ecdysone 3-acetate                           | 4.915529757 | 0.398416721 | 4.334080687 | 0.433330119 | 0.036091 | Up   |
| LC | 2-keto-n-caprylic acid                                                 | 4.751938713 | 0.100147448 | 4.914458732 | 0.141595569 | 0.044605 | Down |
| LC | 2-methyl-2-dodecenoic acid                                             | 3.190446171 | 0.94481006  | 2.07843577  | 0.63736693  | 0.037959 | Up   |
| LC | 3beta-Hydroxy-5alpha,6alpha-epoxy-9-oxo-9,10-seco-5-cholest-7-en-11-al | 7.008682441 | 0.339969318 | 7.747437823 | 0.375414939 | 0.005071 | Down |
| LC | 3'-Deoxydryopteris acid                                                | 4.334217519 | 1.29038249  | 5.908306227 | 1.084877803 | 0.045235 | Down |
| LC | 3-hydroxy-suberic acid                                                 | 4.606828427 | 0.075469365 | 4.819687279 | 0.150457215 | 0.011297 | Down |
| LC | 3-keto-n-caprylic acid                                                 | 5.063599858 | 0.224310968 | 4.634069769 | 0.245350352 | 0.010074 | Up   |
| LC | 3'-O-methylbatatasin III                                               | 2.871265753 | 0.793971086 | 0.366674798 | 1.894980785 | 0.021408 | Up   |
| LC | 3S-squalene-2,3-epoxide                                                | 2.412583393 | 1.472072614 | 0.66528964  | 1.180610305 | 0.04672  | Up   |
| LC | 3Z,6Z,9Z,12Z,15Z-Tricosapentaene                                       | 8.511694326 | 0.206674135 | 8.103308029 | 0.338641743 | 0.030311 | Up   |
| LC | 3Z,6Z-Eicosadiene                                                      | 2.659168658 | 0.226332152 | 2.131197802 | 0.354453341 | 0.011737 | Up   |
| LC | 5,7,3',5'-Tetrahydroxy-3,6,8,4'-tetramethoxyflavone                    | 5.295420829 | 0.091598441 | 5.510105495 | 0.195144575 | 0.034885 | Down |
| LC | 5,7,4'-Trihydroxyflavanone 7-sulfate                                   | 4.812505575 | 1.588595916 | 2.144629358 | 1.835745108 | 0.022628 | Up   |
| LC | 5alpha,9alpha-epidioxy-cholest-7-en-3beta,6alpha-diol                  | 2.684617875 | 0.52810527  | 1.382652727 | 0.988913357 | 0.017408 | Up   |
| LC | 5alpha-Cholestane-3alpha,7alpha,16alpha,26-tetrol                      | 4.791916026 | 1.792363664 | 2.523765892 | 1.440329507 | 0.036295 | Up   |
| LC | 5-Carboxypyranocyanidin 3-O-beta-glucopyranoside                       | 2.419576444 | 0.522430789 | 1.673650698 | 0.522522002 | 0.032946 | Up   |
| LC | 5-HEPE                                                                 | 6.345456932 | 0.647094948 | 5.322230598 | 0.766433987 | 0.031517 | Up   |
| LC | 5S,9S-Dimethyloctadecane                                               | 2.225265989 | 1.58110549  | 3.954725527 | 0.80424074  | 0.03808  | Down |
| LC | 7-Acetoxy-7,8-dihydroiodovulone I                                      | 1.88120702  | 0.097749362 | 1.617826208 | 0.266200663 | 0.046176 | Up   |
| LC | 7-Ethyl-3,11-dimethyl-1,3Z,6E,10-tridecatetraene                       | 6.82587076  | 0.138535214 | 6.477844672 | 0.331653073 | 0.039156 | Up   |
| LC | 7-Ketocholesterol                                                      | 2.256457282 | 0.86893143  | 0.429114876 | 0.337826844 | 0.000722 | Up   |
| LC | 7-oxo-8-amino-nonanoic acid                                            | 2.666743946 | 0.238389166 | 2.029429612 | 0.237558019 | 0.000924 | Up   |
| LC | 8beta-Hydroxy-3-longipinen-5-one                                       | 4.38277528  | 0.086232881 | 4.550467048 | 0.150028413 | 0.039029 | Down |



|    |                                           |             |             |             |             |          |      |
|----|-------------------------------------------|-------------|-------------|-------------|-------------|----------|------|
| LC | 9,12,13-TriHOME                           | 8.281236524 | 0.41665488  | 8.787039008 | 0.349428351 | 0.04591  | Down |
| LC | Adenosine monophosphate                   | 7.207803715 | 0.29380523  | 6.638832958 | 0.307834739 | 0.008358 | Up   |
| LC | Allopregnanolone                          | 7.995290758 | 0.883864375 | 6.937422964 | 0.591331062 | 0.035048 | Up   |
| LC | Alpha-ketoisovaleric acid                 | 1.5984443   | 0.438030065 | 2.308372791 | 0.567910435 | 0.035778 | Down |
| LC | Artelastochromene                         | 4.407467008 | 0.221878735 | 4.03087023  | 0.280965434 | 0.027574 | Up   |
| LC | Caffeine                                  | 6.867536125 | 0.071214404 | 7.03217085  | 0.162187603 | 0.046047 | Down |
| LC | Carnosine                                 | 2.235503763 | 0.500599007 | 3.037808249 | 0.456690844 | 0.015828 | Down |
| LC | Cer(d18:0/25:0)                           | 2.762248672 | 0.169012138 | 3.040148948 | 0.243059947 | 0.044303 | Down |
| LC | Chamazulene                               | 4.579301071 | 0.62561933  | 2.849552077 | 1.537460135 | 0.028735 | Up   |
| LC | Cholesterol sulfate                       | 3.502299711 | 0.233424278 | 2.89776056  | 0.534186371 | 0.029355 | Up   |
| LC | Coumesterol                               | 4.076099133 | 0.72096701  | 3.023865567 | 0.590581318 | 0.019939 | Up   |
| LC | CPA(18:1(9Z))                             | 5.773928023 | 0.624161517 | 5.036171925 | 0.389407357 | 0.038238 | Up   |
| LC | Cytosine                                  | 3.689952389 | 1.071203393 | 2.59572297  | 0.447961512 | 0.043624 | Up   |
| LC | Dehydrodolineone                          | 6.51379096  | 1.088096341 | 5.237038788 | 0.833854912 | 0.045682 | Up   |
| LC | Dehydrodolineone                          | 2.839305524 | 1.264539894 | 0.91802498  | 0.688370837 | 0.008449 | Up   |
| LC | DG(22:5(4Z,7Z,10Z,13Z,16Z)/24:1(15Z)/0:0) | 1.397536251 | 1.403820954 | 4.125713109 | 1.331613801 | 0.006188 | Down |
| LC | diamino-pimelic acid                      | 2.324260255 | 0.486995692 | 1.44801414  | 0.667322286 | 0.026578 | Up   |
| LC | Dimethyl sulfone                          | 8.750602289 | 0.071786286 | 8.917746577 | 0.144207247 | 0.029283 | Down |
| LC | D-Sedoheptulose 7-phosphate               | 5.840439636 | 0.598461486 | 5.181395399 | 0.33900981  | 0.040846 | Up   |
| LC | GlcCer(d16:1/23:0)                        | 6.56718589  | 0.072923658 | 6.73421822  | 0.124167464 | 0.017509 | Down |
| LC | Guanosine monophosphate                   | 7.164726738 | 0.248152008 | 6.321821065 | 0.643322184 | 0.022134 | Up   |
| LC | Homocysteine thiolactone                  | 5.212490627 | 0.134801111 | 4.982292606 | 0.189675901 | 0.035866 | Up   |
| LC | Homovanillic acid                         | 5.162158689 | 0.095449862 | 5.342647037 | 0.17018182  | 0.046905 | Down |
| LC | Hydrocinnamic acid                        | 3.02989436  | 0.483048672 | 1.955896307 | 0.820515114 | 0.020028 | Up   |
| LC | Hydroxyphthioceranic acid (C31)           | 3.457439462 | 0.732040077 | 1.745301229 | 0.7607908   | 0.002634 | Up   |

|    |                                                                     |              |             |              |             |          |      |
|----|---------------------------------------------------------------------|--------------|-------------|--------------|-------------|----------|------|
| LC | Hydroxyphthioceranic acid (C42)                                     | 6.993381494  | 0.633068916 | 6.170825312  | 0.612113648 | 0.045165 | Up   |
| LC | Hypericin                                                           | 5.270154473  | 0.779837106 | 4.011307699  | 0.745965622 | 0.017035 | Up   |
| LC | Ibuprofen                                                           | 5.640556944  | 0.805445909 | 4.264664021  | 1.175477813 | 0.039603 | Up   |
| LC | Isorhamnetin 3-(6''-galloylglucoside)                               | 7.15023542   | 0.631967942 | 6.050994772  | 0.646808451 | 0.013866 | Up   |
| LC | Iso-Valeraldehyde                                                   | 3.633548463  | 0.087920082 | 3.828562009  | 0.122015844 | 0.009882 | Down |
| LC | Leukotriene B4                                                      | 7.29711009   | 0.622369706 | 6.260658835  | 0.681200816 | 0.020427 | Up   |
| LC | Leukotriene B4                                                      | 5.858217602  | 0.824317515 | 4.683075793  | 0.915340804 | 0.041565 | Up   |
| LC | Linoleic acid                                                       | 3.827477397  | 0.881684849 | 2.522332759  | 0.764400066 | 0.020845 | Up   |
| LC | L-Malic acid                                                        | 6.557983489  | 0.48301801  | 5.996777648  | 0.296970215 | 0.03579  | Up   |
| LC | L-Phenylalanine                                                     | 5.813652306  | 0.283728512 | 5.500451644  | 0.028035093 | 0.042408 | Up   |
| LC | L-Proline                                                           | 2.725336744  | 0.074556584 | 2.535836417  | 0.150492173 | 0.019998 | Up   |
| LC | Luteolin 7-glucuronosyl-(1->2)-glucuronide-4'-glucuronide           | 0.911592256  | 1.476548654 | 3.006171502  | 1.00086713  | 0.016491 | Down |
| LC | LysoPC(16:1(9Z))                                                    | 9.753547912  | 0.858623372 | 8.707731875  | 0.546329736 | 0.030535 | Up   |
| LC | LysoPC(18:1(9Z))                                                    | 11.13911874  | 0.512709161 | 10.47513983  | 0.184721265 | 0.013704 | Up   |
| LC | LysoPC(18:4(6Z,9Z,12Z,15Z))                                         | -0.044734514 | 1.896894473 | 2.068105948  | 1.291910957 | 0.047771 | Down |
| LC | LysoPC(20:0)                                                        | 9.584077457  | 0.54196421  | 8.870856342  | 0.408852161 | 0.02773  | Up   |
| LC | LysoPC(22:1(13Z))                                                   | 8.129247887  | 0.229186445 | 7.662899416  | 0.442004299 | 0.044685 | Up   |
| LC | LysoPC(22:4(7Z,10Z,13Z,16Z))                                        | 8.121714363  | 0.600100825 | 7.430995432  | 0.459206161 | 0.049084 | Up   |
| LC | makisterone B                                                       | 3.861896129  | 1.462841555 | 2.02121897   | 1.324610097 | 0.045422 | Up   |
| LC | Malvidin 3-glucoside-5-(6''-malonylglucoside)                       | 5.170880629  | 0.399137247 | 4.618453183  | 0.184078604 | 0.011669 | Up   |
| LC | Menthol                                                             | 4.999474319  | 0.082339776 | 5.200318856  | 0.152129509 | 0.017428 | Down |
| LC | methyl 8-[2-(2-formyl-vinyl)-3-hydroxy-5-oxo-cyclopentyl]-octanoate | 10.91468484  | 0.06159747  | 11.07948025  | 0.151605398 | 0.033289 | Down |
| LC | methyl 8-[2-(2-formyl-vinyl)-3-hydroxy-5-oxo-cyclopentyl]-octanoate | 2.464923621  | 2.766800028 | -1.293253783 | 1.842279394 | 0.019807 | Up   |
| LC | Minabeolide-1                                                       | 4.696276787  | 0.502833628 | 3.947171841  | 0.445650918 | 0.021159 | Up   |
| LC | N,N-(2,2-dihydroxy-ethyl) arachidonoyl amine                        | 6.159703179  | 2.96122807  | 2.674869198  | 0.834067794 | 0.033463 | Up   |

|    |                                                                          |             |             |             |             |          |      |
|----|--------------------------------------------------------------------------|-------------|-------------|-------------|-------------|----------|------|
| LC | Naringenin 7-O-(2'',6''-di-O-alpha-rhamnopyranosyl)-beta-glucopyranoside | 5.114924299 | 0.248624044 | 4.118481339 | 1.027339389 | 0.043569 | Up   |
| LC | N-linolenoyl-glutamine                                                   | 2.817702434 | 1.139122643 | 1.091964317 | 1.382360589 | 0.039958 | Up   |
| LC | N-stearoyl GABA                                                          | 4.630501304 | 0.091321658 | 4.73975222  | 0.061579695 | 0.035473 | Down |
| LC | Oleic acid                                                               | 8.913110766 | 0.377274185 | 8.53195136  | 0.171182072 | 0.047887 | Up   |
| LC | PA(18:1(11Z)/18:1(11Z))                                                  | 1.700933213 | 0.60848396  | 2.545250027 | 0.309544468 | 0.01269  | Down |
| LC | PA(18:1(9Z)/0:0)                                                         | 6.767592884 | 0.614248489 | 6.07370043  | 0.409859143 | 0.044124 | Up   |
| LC | PA(18:1(9Z)/0:0)                                                         | 7.609212153 | 0.502484605 | 6.858527764 | 0.418641011 | 0.018428 | Up   |
| LC | PA(19:1(9Z)/0:0)                                                         | 10.437441   | 0.70355187  | 9.400334741 | 0.377595079 | 0.009794 | Up   |
| LC | PA(O-16:0/14:0)                                                          | 2.995100966 | 0.423094461 | 2.413972589 | 0.449462454 | 0.0438   | Up   |
| LC | PA(P-16:0/15:1(9Z))                                                      | 4.312130585 | 1.36869825  | 1.027635384 | 1.404002856 | 0.002134 | Up   |
| LC | PC(13:0/0:0)                                                             | 5.011193504 | 0.851298322 | 3.972951994 | 0.687524626 | 0.042475 | Up   |
| LC | PC(15:1(9Z)/0:0)                                                         | 7.706333215 | 0.808586436 | 6.533097575 | 0.553272024 | 0.014958 | Up   |
| LC | PC(16:0/2:0)                                                             | 5.656047628 | 0.806150522 | 4.658275427 | 0.639316891 | 0.038916 | Up   |
| LC | PC(17:1(10Z)/0:0)                                                        | 11.11790377 | 0.367640973 | 10.6663781  | 0.193317266 | 0.023788 | Up   |
| LC | PC(17:1(10Z)/0:0)                                                        | 9.860910461 | 0.822663603 | 8.846490758 | 0.692472099 | 0.043449 | Up   |
| LC | PC(18:0/2:0)                                                             | 5.843399989 | 0.257431866 | 5.457306607 | 0.187394996 | 0.014043 | Up   |
| LC | PC(18:1(9Z)/4:0)                                                         | 5.074767301 | 0.236632405 | 4.225422915 | 0.525811157 | 0.004783 | Up   |
| LC | PC(19:1(9Z)/0:0)                                                         | 5.546513929 | 0.329969897 | 5.015277202 | 0.377253005 | 0.02666  | Up   |
| LC | PC(19:1(9Z)/0:0)                                                         | 8.740431268 | 0.390754988 | 8.116342332 | 0.411669644 | 0.022571 | Up   |
| LC | PC(19:3(10Z,13Z,16Z)/0:0)                                                | 3.334503968 | 0.377109502 | 2.721473998 | 0.463312604 | 0.030721 | Up   |
| LC | PC(19:3(10Z,13Z,16Z)/0:0)                                                | 2.710052598 | 0.479181956 | 2.055255295 | 0.480980093 | 0.03979  | Up   |
| LC | PC(O-11:1(10E)/2:0)                                                      | 5.952879374 | 0.986863613 | 4.853270491 | 0.41427672  | 0.030566 | Up   |
| LC | PC(O-12:0/O-2:0)                                                         | 5.2925044   | 0.813656307 | 4.278579039 | 0.655210521 | 0.038784 | Up   |
| LC | PC(O-15:0/0:0)                                                           | 7.841826148 | 0.328710231 | 7.354732199 | 0.276480681 | 0.019525 | Up   |

|    |                                        |             |             |              |             |          |      |
|----|----------------------------------------|-------------|-------------|--------------|-------------|----------|------|
| LC | PC(O-16:0/0:0)                         | 9.694982938 | 0.32525391  | 9.201833538  | 0.283319992 | 0.01878  | Up   |
| LC | PC(O-16:0/0:0)                         | 12.77993226 | 0.514533612 | 12.03114571  | 0.411907296 | 0.019357 | Up   |
| LC | PC(O-16:0/O-18:1(9Z))                  | 5.756639453 | 0.089716297 | 5.883350735  | 0.069355498 | 0.020938 | Down |
| LC | PC(O-16:0/O-2:0)                       | 13.6304405  | 0.714143359 | 12.61850363  | 0.637243776 | 0.02696  | Up   |
| LC | PC(O-17:0/0:0)                         | 7.660668652 | 0.528540502 | 6.989454431  | 0.491176312 | 0.04589  | Up   |
| LC | PC(O-18:0/14:0)                        | 4.512286866 | 0.332593296 | 3.935365603  | 0.181876917 | 0.003924 | Up   |
| LC | PC(O-18:0/O-2:1(1E))                   | 8.462858664 | 0.523702164 | 7.742040329  | 0.466178839 | 0.030478 | Up   |
| LC | PC(O-6:0/O-6:0)                        | 1.718084728 | 1.026199281 | -0.212002445 | 0.851268512 | 0.005305 | Up   |
| LC | PE(14:0/15:0)                          | 8.324720736 | 1.249098174 | 6.905326109  | 0.414417896 | 0.037923 | Up   |
| LC | PE(14:0/18:2(9Z,12Z))                  | 9.613163069 | 0.40155377  | 9.13121413   | 0.244031551 | 0.030788 | Up   |
| LC | PE(14:0/18:3(9Z,12Z,15Z))              | 7.581143109 | 0.45352715  | 8.511161438  | 0.673559345 | 0.01862  | Down |
| LC | PE(14:1(9Z)/24:0)                      | 6.984311564 | 0.077906994 | 7.138271715  | 0.128812689 | 0.031171 | Down |
| LC | PE(18:1(11Z)/18:1(11Z))                | 4.840495249 | 0.398567757 | 5.295875335  | 0.294848297 | 0.048187 | Down |
| LC | PE(20:1(11Z)/0:0)                      | 7.19876021  | 0.814809412 | 6.15407121   | 0.59634059  | 0.029651 | Up   |
| LC | PE(22:4(7Z,10Z,13Z,16Z)/0:0)           | 7.4820353   | 0.516195435 | 6.778159052  | 0.466753376 | 0.032684 | Up   |
| LC | PE(O-18:0/O-18:0)                      | 5.829849556 | 0.644216265 | 4.977731363  | 0.654892081 | 0.046403 | Up   |
| LC | PE(O-20:0/0:0)                         | 5.566836065 | 1.107386276 | 4.059773258  | 1.002487502 | 0.03303  | Up   |
| LC | Peonidin                               | 5.961280488 | 0.587786854 | 5.094088454  | 0.249198522 | 0.007654 | Up   |
| LC | PG(20:2(11Z,14Z)/22:4(7Z,10Z,13Z,16Z)) | 5.794865558 | 0.050312837 | 5.977192705  | 0.159067802 | 0.023214 | Down |
| LC | PG(20:4(5Z,8Z,11Z,14Z)/0:0)            | 6.578891492 | 0.284129304 | 6.242714181  | 0.221370077 | 0.045304 | Up   |
| LC | PG(22:4(7Z,10Z,13Z,16Z)/0:0)           | 5.263688454 | 0.204535735 | 4.602770423  | 0.353329593 | 0.002663 | Up   |
| LC | PGF2alpha-11-acetate                   | 7.314001584 | 0.061267522 | 7.486128214  | 0.14039983  | 0.020395 | Down |
| LC | PGF2alpha-EA(d4)                       | 4.598103152 | 0.059469045 | 4.79171732   | 0.148890328 | 0.022834 | Down |
| LC | PGH2-EA                                | 3.64672526  | 1.417934001 | 0.827007932  | 2.034933593 | 0.019292 | Up   |
| LC | PI(20:4(5Z,8Z,11Z,14Z)/16:1(9Z))       | 1.132935224 | 0.624215545 | 1.848677913  | 0.323340783 | 0.031776 | Down |

|    |                                              |             |                  |             |             |          |      |
|----|----------------------------------------------|-------------|------------------|-------------|-------------|----------|------|
| LC | PI(O-18:0/0:0)                               | 6.755432336 | 0.787552955      | 5.785835552 | 0.674388703 | 0.044966 | Up   |
| LC | Pongamoside A                                | 5.692294816 | 3.089450518      | 2.054392334 | 2.01009101  | 0.036207 | Up   |
| LC | Primflaside                                  | 3.272328763 | 0.242637151      | 2.29103925  | 0.338208664 | 0.000179 | Up   |
| LC | Prosafrinine                                 | 3.614669657 | 0.836841935      | 5.320933518 | 1.154269786 | 0.015002 | Down |
| LC | Prostaglandin E2                             | 8.676102067 | 0.058416017      | 8.835976443 | 0.148854124 | 0.034316 | Down |
| LC | PS(18:1(9Z)/20:4(5Z,8Z,11Z,14Z))             | 1.210943848 | 0.712026503      | 2.367661819 | 0.622670657 | 0.013447 | Down |
| LC | PS(18:4(6Z,9Z,12Z,15Z)/22:4(7Z,10Z,13Z,16Z)) | 7.230669265 | 0.315134615      | 6.765082405 | 0.278160619 | 0.021814 | Up   |
| LC | PS(22:1(11Z)/0:0)                            | 4.649027547 | 0.421758088      | 3.77216461  | 0.787848089 | 0.037092 | Up   |
| LC | PS(O-18:0/0:0)                               | 7.476824772 | 1.006352978      | 6.183861694 | 0.815895711 | 0.034575 | Up   |
| LC | Resolvin D1                                  | 9.629207567 | 0.082909173      | 9.787476784 | 0.129652102 | 0.030433 | Down |
| LC | Sophoracoumestan A                           | 2.690787494 | 1.367721447      | 4.373688688 | 1.062246149 | 0.038588 | Down |
| LC | Tetrahydrocurcumin                           | 2.047613425 | 0.160440268      | 2.264565869 | 0.129505795 | 0.027539 | Down |
| LC | TG(12:0/12:0/18:1(9Z))[iso3]                 | 5.060248725 | 0.099767684      | 5.254564096 | 0.148253778 | 0.023753 | Down |
| LC | TG(16:1(9Z)/16:1(9Z)/16:1(9Z))[iso]          | 5.837485421 | 0.347523654      | 6.38499668  | 0.464212053 | 0.043305 | Down |
| LC | Thonningianin B                              | 5.050614628 | 1.508494273      | 2.786975676 | 1.620452427 | 0.031205 | Up   |
| LC | Topiramate                                   | 6.262914345 | 0.397114693      | 5.571780304 | 0.314948702 | 0.007489 | Up   |
| LC | Tricosanyl palmitoleate                      | 6.347451929 | 0.960012196      | 5.397439533 | 0.377023698 | 0.047674 | Up   |
| LC | Uridine 5'-monophosphate                     | 7.54492148  | 0.551906321      | 6.554861122 | 0.54843621  | 0.010932 | Up   |
| LC | Viscutin 1                                   | 3.499212667 | 1.207518574      | 1.633528341 | 0.829929341 | 0.010893 | Up   |
| LC | zymosterol intermediate 1c                   | 3.070755992 | 0.490171058      | 1.315469151 | 1.464138783 | 0.031215 | Up   |
| GC | 5-Aminovaleric Acid                          | 0.741823048 | 1.985970476<br>4 | 3.457201363 | 2.181564674 | 0.047807 | Down |
| GC | Maltotriose                                  | 0.603596544 | 1.606451261<br>3 | 2.693996766 | 1.42040237  | 0.038097 | Down |
| GC | Digalacturonic Acid                          | 0.428347999 | 0.122956678      | 0.937702701 | 0.409046164 | 0.027139 | Down |

|    |                           |             |                  |              |             |          |    |
|----|---------------------------|-------------|------------------|--------------|-------------|----------|----|
|    |                           |             | 5                |              |             |          |    |
| GC | Nicotianamine             | 0.460128668 | 0.214830592<br>2 | 0.095726222  | 0.224642939 | 0.016622 | Up |
| GC | Uracil                    | 5.167285728 | 0.382720928<br>6 | 4.727969076  | 0.250519013 | 0.040465 | Up |
| GC | Succinic Acid             | 1.534472221 | 0.441474537<br>4 | 1.050004108  | 0.265566044 | 0.043999 | Up |
| GC | 3-Hydroxybutyric Acid     | 3.676176102 | 0.339576844<br>9 | 3.114697934  | 0.393166761 | 0.024423 | Up |
| GC | N-Carbamoylaspartate      | 4.021588366 | 0.686286937<br>6 | 2.816054342  | 0.633923381 | 0.010146 | Up |
| GC | Fructose-1,6-Bisphosphate | 2.199852785 | 1.817602256<br>3 | -0.329478121 | 1.828761353 | 0.037132 | Up |
| GC | 3-Phosphoglycerate        | 6.284178583 | 1.903963298<br>7 | 3.65607608   | 2.114367606 | 0.047166 | Up |
| GC | Mannonic Acid             | 3.180831827 | 2.199916785<br>8 | 0.336671698  | 0.398173109 | 0.024218 | Up |
| GC | Hydroxycarbamate          | 4.992195651 | 2.271828270<br>0 | -0.26492069  | 1.397413843 | 0.000694 | Up |

**Sup Table 4b. Metabolomic analysis of serum samples obtained from DL and HC groups.**

| Platform | Metabolites                                                                                                               | Relative Abundance in DL monkeys |             | Relative Abundance in HC monkeys |             | P value  | DL/CON  |
|----------|---------------------------------------------------------------------------------------------------------------------------|----------------------------------|-------------|----------------------------------|-------------|----------|---------|
|          |                                                                                                                           | MEAN                             | Std         | MEAN                             | Std         |          |         |
| GC/LC    | Name                                                                                                                      |                                  |             |                                  |             |          | UP/DOWM |
| GC       | Beta-Alanine                                                                                                              | 1.67202434                       | 0.941066815 | 2.873660197                      | 0.879835462 | 0.04542  | Down    |
| GC       | Arabitol                                                                                                                  | 1.99391435                       | 0.392764884 | 2.90426501                       | 0.814214103 | 0.033292 | Down    |
| GC       | Serine                                                                                                                    | 5.600799176                      | 0.333063223 | 6.156001969                      | 0.493218597 | 0.04539  | Down    |
| GC       | 1,2,4-Benzenetriol                                                                                                        | 6.694849491                      | 2.875825416 | 3.197274965                      | 0.479089102 | 0.030276 | Up      |
| LC       | 11alpha-(chloromethyl)-1alpha,25-dihydroxyvitamin D3 /<br>11alpha-(chloromethyl)-1alpha,25-dihydroxycholecalciferol       | 5.742720924                      | 0.468601758 | 2.087482083                      | 2.660668123 | 0.019328 | Up      |
| LC       | 12-bromo-octadecanoic acid                                                                                                | 4.698500592                      | 0.446905827 | 1.713817961                      | 2.618405013 | 0.037848 | Up      |
| LC       | 18-nonadecynoic acid                                                                                                      | 5.837346203                      | 0.401063187 | 6.348572506                      | 0.178271536 | 0.024952 | Down    |
| LC       | 19-norcholestenone                                                                                                        | 6.182864222                      | 0.272650943 | 6.491656371                      | 0.18360865  | 0.044174 | Down    |
| LC       | 1alpha-hydroxy-26,27-dinorvitamin D3 25-carboxylic acid /<br>1alpha-hydroxy-26,27-dinorcholecalciferol 25-carboxylic acid | 5.421299879                      | 1.115397048 | 2.728183162                      | 1.777160451 | 0.010439 | Up      |
| LC       | 1beta,3alpha,7alpha,12alpha-Tetrahydroxy-5beta-cholan-24-oic Acid                                                         | 6.119878853                      | 0.469309042 | 3.39886786                       | 2.563907039 | 0.04788  | Up      |
| LC       | 2-hydroxy-tridecanoic acid                                                                                                | 7.242392365                      | 0.197570068 | 6.624772769                      | 0.542812141 | 0.037884 | Up      |
| LC       | 3-carboxy-4-methyl-5-propyl-2-furanpropanoic acid                                                                         | 3.668470294                      | 4.035914272 | 8.631950118                      | 3.102924388 | 0.038075 | Down    |
| LC       | 3-demethylubiquinone-9                                                                                                    | 0.149290131                      | 1.778788396 | 2.264700083                      | 0.349776146 | 0.017006 | Down    |
| LC       | 4-Acetamidobutanoic acid                                                                                                  | -5.449217851                     | 3.800529482 | 0.534445777                      | 2.8727756   | 0.01171  | Down    |
| LC       | 5,7,3',4'-Tetrahydroxy-6,5'-di-C-prenylflavanone                                                                          | 4.785625916                      | 0.383129748 | 5.271013378                      | 0.330854059 | 0.04073  | Down    |
| LC       | 6-deoxyerythronolide B                                                                                                    | 4.947184397                      | 1.44064215  | 3.272368707                      | 1.067249855 | 0.045154 | Up      |
| LC       | 7alpha,12alpha,25-Trihydroxycholest-4-en-3-one                                                                            | 5.113758629                      | 0.791970238 | 3.798635774                      | 1.062483573 | 0.035395 | Up      |

|    |                                       |             |             |             |             |          |      |
|----|---------------------------------------|-------------|-------------|-------------|-------------|----------|------|
| LC | 7-oxo-8-amino-nonanoic acid           | 1.384571039 | 2.302126689 | -1.2192254  | 0.908767538 | 0.02756  | Up   |
| LC | Adonixanthin 3-glucoside              | 3.583525145 | 0.839250286 | 4.771601847 | 0.378942445 | 0.010152 | Down |
| LC | Antiarone D                           | 7.507908757 | 0.292507069 | 7.980992296 | 0.199279376 | 0.008373 | Down |
| LC | Caloxanthin sulfate                   | 5.688934214 | 1.212941365 | 2.380583203 | 3.111704606 | 0.048382 | Up   |
| LC | Fumonisin A1                          | 2.37354148  | 0.377064297 | 3.028065289 | 0.260400327 | 0.005739 | Down |
| LC | Muxiangrin III                        | 5.033151811 | 0.431514134 | 5.55364172  | 0.162988386 | 0.019993 | Down |
| LC | PA(17:2(9Z,12Z)/0:0)                  | 5.328718738 | 0.276794478 | 5.893385131 | 0.22241227  | 0.002984 | Down |
| LC | PC(16:0/P-18:1(11Z))                  | 6.984127424 | 0.240804146 | 7.269870394 | 0.196413104 | 0.047985 | Down |
| LC | PC(20:5(5Z,8Z,11Z,14Z,17Z)/24:1(15Z)) | 3.14130852  | 2.495452265 | 6.189628673 | 1.765825705 | 0.0347   | Down |
| LC | PE(22:4(7Z,10Z,13Z,16Z)/24:1(15Z))    | 3.334897244 | 3.074699404 | 7.612341898 | 2.012684704 | 0.017217 | Down |
| LC | PEP-16:0/18:1(11Z))                   | 4.216675771 | 2.300429657 | 6.800417603 | 0.532929355 | 0.023086 | Down |
| LC | PG(22:4(7Z,10Z,13Z,16Z)/0:0)          | 8.991625983 | 0.426868392 | 7.175564229 | 1.461431126 | 0.02738  | Up   |
| LC | Prebarbigerone                        | 4.868140717 | 0.553541904 | 5.456167007 | 0.24045016  | 0.038177 | Down |
| LC | Pseudouridine                         | 4.14200029  | 0.449414191 | 3.565543442 | 0.313608292 | 0.027576 | Up   |



**Sup Table 4c. Metabolomic analysis of hippocampus samples obtained from DL and HC groups.**

| Platform | Metabolites                                                                                                                                                                 | Relative Abundance in DL monkeys |             | Relative Abundance in HC monkeys |             | P Value  | DL/CON  |
|----------|-----------------------------------------------------------------------------------------------------------------------------------------------------------------------------|----------------------------------|-------------|----------------------------------|-------------|----------|---------|
|          |                                                                                                                                                                             | Mean                             | Std         | Mean                             | Std         |          |         |
| GC/LC    | Name                                                                                                                                                                        |                                  |             |                                  |             |          | UP/DOWM |
| GC       | Uridine                                                                                                                                                                     | 3.709000897                      | 2.636887166 | 0.285840971                      | 1.997540896 | 0.029631 | Up      |
| GC       | Mannose-6-Phosphate                                                                                                                                                         | 1.111627695                      | 2.395602785 | -2.38479803                      | 2.205079086 | 0.025145 | Up      |
| GC       | Glutamate                                                                                                                                                                   | 8.992221832                      | 2.244211639 | 0.657753706                      | 4.488008893 | 0.002256 | Up      |
| LC       | (+)-Dysideapalaunic acid                                                                                                                                                    | 3.351107021                      | 0.417434587 | 2.240189622                      | 1.028833333 | 0.034207 | Up      |
| LC       | (6R)-22-oxo-23,24,25,26,27-pentano- <i>vitamin D3</i> 6,19-sulfur dioxide adduct /<br>(6R)-22-oxo-23,24,25,26,27-pentano- <i>cholecalciferol</i> 6,19-sulfur dioxide adduct | 3.995644618                      | 0.35674736  | 3.104744713                      | 0.567285632 | 0.008626 | Up      |
| LC       | (S)-dihydrolipoic acid                                                                                                                                                      | 4.035208433                      | 0.418324266 | 3.473205951                      | 0.308438488 | 0.024369 | Up      |
| LC       | 1-(6-[5]-ladderane-hexanyl)-2-(8-[3]-ladderane-octanyl)-sn-glycerol                                                                                                         | 5.549906876                      | 0.547542289 | 4.799958805                      | 0.504813899 | 0.033297 | Up      |
| LC       | 1-(8-[5]-ladderane-octanoyl)-2-(8-[3]-ladderane-octanyl)-sn-glycerophosphoethanolamine                                                                                      | 13.61885487                      | 0.330086472 | 13.13654831                      | 0.245731314 | 0.016643 | Up      |
| LC       | 1'',2''-Dihydro-8-hydroxyisopentanyl-3'-methoxy-4'-O-methylalpinumisoflavone                                                                                                | 4.442845916                      | 0.659692603 | 3.07848102                       | 1.115291115 | 0.027458 | Up      |
| LC       | 1,7Z,13Z-Pentacosatriene                                                                                                                                                    | 6.045122542                      | 0.423301981 | 5.005989866                      | 0.525301586 | 0.003644 | Up      |
| LC       | 10E-heptadecen-8-ynoic acid                                                                                                                                                 | 1.703034995                      | 0.282642546 | 2.335045354                      | 0.255987194 | 0.002288 | Down    |
| LC       | 10-nitro-9E-octadecenoic acid                                                                                                                                               | 8.574744466                      | 0.146822632 | 8.291685631                      | 0.256763711 | 0.041048 | Up      |
| LC       | 10Z,13Z,16Z-nonadecatrienenitrile                                                                                                                                           | 2.965309416                      | 1.13146091  | 1.700463556                      | 0.773347024 | 0.047316 | Up      |
| LC       | 11-dehydro-2,3-dinor-TXB2                                                                                                                                                   | 7.765211991                      | 0.391291797 | 7.287990823                      | 0.338491737 | 0.047421 | Up      |
| LC       | 13S-hydroxyoctadecadienoic acid                                                                                                                                             | 3.373451849                      | 0.188377037 | 4.555526743                      | 0.485484961 | 0.001111 | Down    |
| LC       | 15-HETE-T                                                                                                                                                                   | 4.162408041                      | 0.67781618  | 2.992160034                      | 1.093437332 | 0.049997 | Up      |
| LC       | 16a-Hydroxysterone                                                                                                                                                          | 3.527802985                      | 0.592464228 | 2.74217644                       | 0.603063265 | 0.046074 | Up      |

|    |                                                                                                                           |             |             |             |             |          |      |
|----|---------------------------------------------------------------------------------------------------------------------------|-------------|-------------|-------------|-------------|----------|------|
| LC | 17-phenyl-trinor-PGF2alpha amide                                                                                          | 6.247742583 | 0.515534568 | 5.371646867 | 0.805901696 | 0.048744 | Up   |
| LC | 1alpha,25-dihydroxy-21-nor-20-oxavitamin D3 /<br>1alpha,25-dihydroxy-21-nor-20-oxacholecalciferol                         | 5.483049495 | 0.403234843 | 4.742944367 | 0.333156523 | 0.006062 | Up   |
| LC | 1alpha-hydroxy-26,27-dinorvitamin D3 25-carboxylic acid /<br>1alpha-hydroxy-26,27-dinorcholecalciferol 25-carboxylic acid | 9.332190688 | 0.418785902 | 8.694469162 | 0.541520482 | 0.045639 | Up   |
| LC | 1-Methylhistidine                                                                                                         | 3.155403327 | 0.291976363 | 3.572551426 | 0.266803437 | 0.027255 | Down |
| LC | 1-tetradecanyl-2-(8-[3]-ladderane-octanyl)-sn-glycerol                                                                    | 4.775038658 | 0.570269444 | 3.451660381 | 0.814246259 | 0.008561 | Up   |
| LC | 2',4'-Dihydroxychalcone                                                                                                   | 4.13695254  | 0.254182704 | 3.487951473 | 0.278154008 | 0.001774 | Up   |
| LC | 20-carboxy-LTB4                                                                                                           | 4.473933007 | 0.303203731 | 3.673275669 | 0.63420676  | 0.019122 | Up   |
| LC | 26:2(5Z,9Z)(25Me)                                                                                                         | 4.875104619 | 1.244498648 | 1.96705329  | 2.674852083 | 0.036402 | Up   |
| LC | 2E,4E,8Z,10E-dodecatetraenoic acid                                                                                        | 2.588485731 | 1.419679537 | 0.178219141 | 1.757971506 | 0.025917 | Up   |
| LC | 3,5,7-Trimethyl-2E,4E,6E,8E-undecatetraene                                                                                | 2.143212263 | 0.348927738 | 2.776804856 | 0.384126278 | 0.013559 | Down |
| LC | 3beta,4beta,5-Trimethoxy-4'-hydroxy- (6:7)-2,2-dimethylpyranoflavan                                                       | 4.178704932 | 0.380174289 | 3.506989062 | 0.295769945 | 0.006593 | Up   |
| LC | 3beta,4beta,5-Trimethoxy-4'-hydroxy- (6:7)-2,2-dimethylpyranoflavan                                                       | 4.570949918 | 0.507215013 | 3.454856606 | 0.978985029 | 0.03257  | Up   |
| LC | 3beta-hydroxy-4beta-methyl-5alpha-cholest-7-ene-4alpha-carbaldehyde                                                       | 4.357965698 | 0.950821818 | 2.545318094 | 1.562043302 | 0.03557  | Up   |
| LC | 3-Buten-2-one                                                                                                             | 2.062677751 | 0.375669621 | 2.76889863  | 0.485908757 | 0.01827  | Down |
| LC | 3Z,6Z,9Z,12Z,15Z-Pentacosapentaene                                                                                        | 4.364183768 | 0.741147836 | 3.04970027  | 1.013861923 | 0.028189 | Up   |
| LC | 3Z,6Z,9Z,12Z,15Z-Tricosapentaene                                                                                          | 10.48168772 | 0.526956555 | 9.640511675 | 0.749834508 | 0.048325 | Up   |
| LC | 3Z,6Z,9Z-Octadecatriene                                                                                                   | 3.966827757 | 0.457248778 | 3.093860841 | 0.81486739  | 0.045131 | Up   |
| LC | 4-hydroxy-2-oxo-Heptanedioic acid                                                                                         | 2.832475775 | 0.455985327 | 2.166674676 | 0.404163466 | 0.02323  | Up   |
| LC | 4-oxo-Retinoic acid                                                                                                       | 7.763688752 | 0.5464599   | 7.13947397  | 0.210645567 | 0.037495 | Up   |
| LC | 5,7-Dimethoxy-8-prenylflavan                                                                                              | 5.32733349  | 0.450740481 | 4.582019181 | 0.554278659 | 0.028597 | Up   |
| LC | 6Z,9Z,12Z,15Z,18Z-tetracosapentaenoic acid                                                                                | 7.976982731 | 0.264950971 | 7.4646848   | 0.45280454  | 0.037833 | Up   |
| LC | 7-Ethyl-3,11-dimethyl-1,3Z,6E,10-tridecatetraene                                                                          | 6.08654395  | 0.383048725 | 5.341945569 | 0.572583844 | 0.024416 | Up   |
| LC | 7-Geranylformononetin                                                                                                     | 5.702794199 | 0.468802761 | 5.050346191 | 0.504909144 | 0.042804 | Up   |

|    |                                           |             |             |              |             |          |      |
|----|-------------------------------------------|-------------|-------------|--------------|-------------|----------|------|
| LC | 7-Hydroxyflavan                           | 2.976958673 | 0.104240586 | 3.174254788  | 0.169259585 | 0.040021 | Down |
| LC | 7-methyl-6E-hexadecenoic acid             | 7.545974288 | 0.251208733 | 7.000203404  | 0.462281225 | 0.029316 | Up   |
| LC | 9,10-Tetracosadiene                       | 3.092990635 | 0.903271023 | 1.397865215  | 0.955442446 | 0.010194 | Up   |
| LC | 9,11alpha-epoxypregn-4-ene-3,20-dione     | 3.633964264 | 0.253465703 | 3.211815311  | 0.245980304 | 0.015101 | Up   |
| LC | 9S-HpOTrE                                 | 8.920862814 | 0.269117068 | 8.253214335  | 0.378145858 | 0.005506 | Up   |
| LC | Acetylcysteine                            | 2.984675326 | 0.437796418 | 0.848882005  | 1.767235143 | 0.01657  | Up   |
| LC | Ambrettolic acid                          | 2.515677115 | 0.246010042 | 3.158380594  | 0.388666857 | 0.00652  | Down |
| LC | Aminoacetone                              | 3.661846491 | 0.164566055 | 3.253664788  | 0.409927047 | 0.04709  | Up   |
| LC | Bisdemalonylmonardaerin                   | 3.260708918 | 0.438066962 | 2.488046483  | 0.68998195  | 0.043086 | Up   |
| LC | Caproic acid                              | 0.847320364 | 0.902295278 | -0.450705125 | 0.485846397 | 0.011201 | Up   |
| LC | Cer(d18:0/24:0)                           | 4.362398259 | 0.442263469 | 4.922130174  | 0.307689993 | 0.029122 | Down |
| LC | CerP(d18:1/18:0)                          | 1.889378341 | 0.152241019 | 2.629421124  | 0.374811064 | 0.003305 | Down |
| LC | DG(18:1(11Z)/22:5(4Z,7Z,10Z,13Z,16Z)/0:0) | 10.20150349 | 0.365609062 | 9.655242043  | 0.385897956 | 0.030539 | Up   |
| LC | Dimethylglycine                           | 4.740805273 | 0.271399476 | 5.148138111  | 0.207084493 | 0.01523  | Down |
| LC | Dimethyl-L-arginine                       | 4.462413159 | 0.47765453  | 3.563227661  | 0.792599462 | 0.038606 | Up   |
| LC | DMG-MINO                                  | 3.86826006  | 0.484516801 | 3.157811149  | 0.575724918 | 0.043309 | Up   |
| LC | Docosatrienoic acid                       | 9.79010906  | 0.373680129 | 9.20711819   | 0.503304964 | 0.045936 | Up   |
| LC | Dopamine 4-sulfate                        | 4.16639919  | 0.667591838 | 2.304888654  | 1.757566444 | 0.035737 | Up   |
| LC | Eicosenoic acid                           | 9.451419073 | 0.298404311 | 8.9733203    | 0.389225187 | 0.038101 | Up   |
| LC | fucoxanthin                               | 4.914623317 | 0.752851499 | 4.012522992  | 0.386050248 | 0.025964 | Up   |
| LC | Gamma-Glutamylglutamine                   | 6.930593773 | 0.29407329  | 6.311725006  | 0.558563618 | 0.037223 | Up   |
| LC | Gibberellin A36                           | 8.89358108  | 0.235564542 | 8.393980343  | 0.197247235 | 0.002588 | Up   |
| LC | GlcCer(d18:1/18:1(9Z))                    | 7.275212803 | 0.686561327 | 6.273007527  | 0.852033852 | 0.048714 | Up   |
| LC | Glycerophosphocholine                     | 4.906715421 | 0.31443203  | 4.305147897  | 0.554609705 | 0.043413 | Up   |
| LC | Glyoxylic acid                            | 3.870103428 | 0.254189968 | 3.447167399  | 0.202291759 | 0.009671 | Up   |

|    |                                         |             |             |             |             |          |      |
|----|-----------------------------------------|-------------|-------------|-------------|-------------|----------|------|
| LC | Gossypol                                | 4.665598386 | 0.444333127 | 3.806102175 | 0.57086209  | 0.015557 | Up   |
| LC | Homocysteine thiolactone                | 5.443900456 | 0.167781928 | 5.068220957 | 0.371947612 | 0.047753 | Up   |
| LC | Inosine                                 | 8.85994354  | 0.407302829 | 9.420509978 | 0.342384257 | 0.02739  | Down |
| LC | L-Cystine                               | 5.645370383 | 0.474026944 | 4.13847977  | 1.572043575 | 0.048344 | Up   |
| LC | L-Glutamic acid                         | 7.383926117 | 0.252964688 | 7.76599858  | 0.292037533 | 0.035921 | Down |
| LC | LysoPC(18:1(9Z))                        | 12.16002672 | 0.356532354 | 11.61899203 | 0.374284021 | 0.02819  | Up   |
| LC | LysoPC(22:5(4Z,7Z,10Z,13Z,16Z))         | 5.263591979 | 0.607019472 | 4.359302821 | 0.658840516 | 0.032959 | Up   |
| LC | MGDG(18:3(9Z,12Z,15Z)/16:3(7Z,10Z,13Z)) | 2.96069132  | 0.584796496 | 1.918779803 | 0.817819277 | 0.029441 | Up   |
| LC | Mycolipenic acid (C28)                  | 2.186282374 | 0.635721812 | 0.597897572 | 1.213207991 | 0.01753  | Up   |
| LC | Myristic acid                           | 5.567494276 | 0.294338683 | 5.89864833  | 0.127024694 | 0.029856 | Down |
| LC | N-arachidonoyl GABA                     | 6.425678249 | 1.069085694 | 4.051874677 | 2.342164382 | 0.047495 | Up   |
| LC | N-ethyl arachidonoyl amine              | 4.084649367 | 0.20871122  | 4.403022058 | 0.193469029 | 0.020823 | Down |
| LC | N-Oleylethanolamine                     | 7.293525053 | 0.340397496 | 6.664360631 | 0.494352752 | 0.028004 | Up   |
| LC | N-palmitoyl methionine                  | 7.731113219 | 0.467464215 | 6.531733344 | 1.119761361 | 0.035991 | Up   |
| LC | Oleic acid                              | 14.42636378 | 0.115097203 | 14.23504431 | 0.143178579 | 0.028813 | Up   |
| LC | Oleic acid                              | 5.912561957 | 0.652977433 | 5.051054788 | 0.668587712 | 0.047527 | Up   |
| LC | Oxidized glutathione                    | 7.191735751 | 1.007749479 | 8.713837444 | 0.533891483 | 0.012198 | Down |
| LC | PA(14:0/12:0)                           | 2.63888669  | 0.18199736  | 2.938017577 | 0.106152232 | 0.005944 | Down |
| LC | PA(14:0/18:1(9Z))                       | 5.823209027 | 0.204203291 | 5.412455388 | 0.331645982 | 0.02726  | Up   |
| LC | PA(O-16:0/18:2(9Z,12Z))                 | 3.229400149 | 0.895070251 | 1.307444987 | 1.266983523 | 0.012573 | Up   |
| LC | PA(P-18:0/20:5(5Z,8Z,11Z,14Z,17Z))      | 5.110610146 | 0.397797757 | 4.353223526 | 0.30261223  | 0.004029 | Up   |
| LC | Palmitoleic acid                        | 9.452873205 | 0.245072756 | 8.984620721 | 0.387788671 | 0.031431 | Up   |
| LC | PC(15:0/22:6(4Z,7Z,10Z,13Z,16Z,19Z))    | 2.606984959 | 0.577269111 | 1.397995298 | 1.05131111  | 0.033154 | Up   |
| LC | PC(15:1(9Z)/0:0)                        | 9.514783503 | 0.38918225  | 8.860268484 | 0.446471102 | 0.022052 | Up   |
| LC | PC(20:4(5Z,8Z,11Z,14Z)/24:1(15Z))       | 5.289580278 | 1.084318495 | 3.71960578  | 1.158984846 | 0.035877 | Up   |

|    |                                               |             |             |             |             |          |      |
|----|-----------------------------------------------|-------------|-------------|-------------|-------------|----------|------|
| LC | PC(O-11:1(10E)/2:0)                           | 4.648827634 | 0.45631801  | 3.969201329 | 0.50827058  | 0.035017 | Up   |
| LC | PE(14:0/22:2(13Z,16Z))                        | 9.819970102 | 0.263724557 | 9.419119445 | 0.315465698 | 0.038092 | Up   |
| LC | PE(15:1(9Z)/0:0)                              | 2.351116857 | 0.269253137 | 1.759061774 | 0.51505364  | 0.031701 | Up   |
| LC | PE(18:3(9Z,12Z,15Z)/20:2(11Z,14Z))            | 12.56601496 | 0.308907063 | 11.96351128 | 0.340233532 | 0.009309 | Up   |
| LC | PE(20:3(8Z,11Z,14Z)/0:0)                      | 6.896883754 | 0.273165586 | 6.33958254  | 0.330935081 | 0.009799 | Up   |
| LC | PE(22:2(13Z,16Z)/22:6(4Z,7Z,10Z,13Z,16Z,19Z)) | 8.448945833 | 0.298600681 | 7.908678356 | 0.510729382 | 0.049263 | Up   |
| LC | PE(P-18:1(11Z)/22:6(4Z,7Z,10Z,13Z,16Z,19Z))   | 12.34646632 | 0.378200425 | 11.8388559  | 0.369121069 | 0.040448 | Up   |
| LC | PG(18:1(9Z)/0:0)                              | 8.483073385 | 0.836043309 | 9.658165514 | 0.5704226   | 0.01743  | Down |
| LC | PG(18:1(9Z)/12:0)                             | 8.872544375 | 0.202642692 | 8.56027919  | 0.220735809 | 0.028734 | Up   |
| LC | PI(20:0/22:2(13Z,16Z))                        | 7.035403987 | 0.401449659 | 5.994870733 | 0.707581789 | 0.010636 | Up   |
| LC | PS(12:0/17:0)                                 | 3.063257057 | 0.27174965  | 3.425594007 | 0.290071093 | 0.049596 | Down |
| LC | PS(17:0/20:3(8Z,11Z,14Z))                     | 11.69924774 | 0.235322033 | 11.29992281 | 0.335074558 | 0.03803  | Up   |
| LC | Quassin                                       | 8.860379119 | 0.184424812 | 8.352867391 | 0.493982707 | 0.040115 | Up   |
| LC | Serpyllin                                     | 4.32286176  | 0.206919813 | 3.851759416 | 0.442699316 | 0.039856 | Up   |
| LC | Tephrowatsin B                                | 7.520698832 | 0.320854891 | 6.954177425 | 0.293976561 | 0.009673 | Up   |
| LC | Tetrahydrocortisone                           | 4.802802569 | 0.3645836   | 3.9147393   | 0.706453781 | 0.020966 | Up   |
| LC | TG(18:2(9Z,12Z)/14:0/18:3(9Z,12Z,15Z))[iso6]  | 7.929810705 | 0.244081328 | 8.3210506   | 0.335408061 | 0.043488 | Down |
| LC | Vanylglycol                                   | 3.888547426 | 0.4106276   | 4.578579695 | 0.496110965 | 0.025398 | Down |
| LC | Villosin                                      | 1.236052701 | 0.603642089 | 0.580120283 | 0.329783834 | 0.041635 | Up   |

**Sup Table 4d. Metabolomic analysis of feces samples obtained from DL and HC groups.**

| Platform | Metabolites                                                                                                         | Relative Abundance in DL monkeys |             | Relative Abundance in HC monkeys |             | P value  | DL/CON  |
|----------|---------------------------------------------------------------------------------------------------------------------|----------------------------------|-------------|----------------------------------|-------------|----------|---------|
|          |                                                                                                                     | Mean                             | Std         | Mean                             | Std         |          |         |
| GC/LC    | Name                                                                                                                |                                  |             |                                  |             |          | UP/DOWN |
| GC       | cyanoalanine                                                                                                        | -3.069741591                     | 2.847110897 | 0.130130491                      | 0.363860466 | 0.039872 | Down    |
| GC       | conduritol-beta-expoide                                                                                             | 4.349879667                      | 0.871098044 | 5.848714217                      | 1.24148279  | 0.036013 | Down    |
| GC       | 2-hydroxyglutaric acid                                                                                              | 2.0070788                        | 0.227192808 | 2.572274519                      | 0.296557942 | 0.004069 | Down    |
| GC       | beta-alanine                                                                                                        | 1.228858863                      | 0.286295329 | 0.602701628                      | 0.559760134 | 0.03488  | Up      |
| GC       | 1-monostearin                                                                                                       | 3.716016023                      | 0.209283788 | 2.992628298                      | 0.600452191 | 0.019232 | Up      |
| GC       | octadecanol                                                                                                         | 4.669274033                      | 0.481586622 | 3.553431277                      | 0.870105674 | 0.025729 | Up      |
| GC       | sarcosine                                                                                                           | 5.37536713                       | 2.2223188   | 2.166330419                      | 2.006801966 | 0.025373 | Up      |
| GC       | glycerol-1-phosphate                                                                                                | 4.814278427                      | 2.689406593 | 1.463080118                      | 1.954487996 | 0.033156 | Up      |
| GC       | 3-arylcarbonyl-alanine                                                                                              | 4.162501317                      | 2.378973928 | 0.191288551                      | 2.812636172 | 0.024709 | Up      |
| GC       | galactose-6-phosphate                                                                                               | 6.184364798                      | 0.517663825 | 0.747968361                      | 0.99872515  | 3.32E-07 | Up      |
| LC       | (-)-11-hydroxy-9,10-dihydrojasmonic acid 11-beta-D-glucoside                                                        | 4.219022676                      | 0.724608021 | 3.057190179                      | 1.03637993  | 0.04814  | Up      |
| LC       | (6R)-25-hydroxyvitamin D3 6,19-sulfur dioxide adduct /<br>(6R)-25-hydroxycholecalciferol 6,19-sulfur dioxide adduct | 10.95120954                      | 0.541309899 | 10.22392392                      | 0.531125097 | 0.040702 | Up      |
| LC       | (6S)-dehydrovomifoliol                                                                                              | 7.697762431                      | 0.062326168 | 7.590064456                      | 0.044496121 | 0.00628  | Up      |
| LC       | (E)-4-Nitrostilbene                                                                                                 | 1.333652658                      | 0.206639934 | 1.619208171                      | 0.150133874 | 0.020887 | Down    |
| LC       | 12,13-DiHODE                                                                                                        | 2.409582614                      | 1.562011647 | 0.257329829                      | 0.72234976  | 0.011975 | Up      |
| LC       | 13-chloro-docosane-1,14-disulfate                                                                                   | 5.369651981                      | 1.202742251 | 3.830814061                      | 0.985691327 | 0.035819 | Up      |
| LC       | 15-deoxy-delta-12,14-PGJ2-d4                                                                                        | 4.104111205                      | 1.467344038 | 2.322733844                      | 0.945508623 | 0.031463 | Up      |
| LC       | 1alpha,25-Dihydroxyvitamin D3 25-trimethylsilyl ether                                                               | 3.18722528                       | 1.742326555 | 0.165406986                      | 1.694604609 | 0.012348 | Up      |
| LC       | 24,24-difluoro-1alpha-hydroxyvitamin D3 /                                                                           | 6.13732251                       | 0.233802179 | 6.681593855                      | 0.308512172 | 0.006288 | Down    |

|    |                                                                                                                   |             |             |              |             |          |      |
|----|-------------------------------------------------------------------------------------------------------------------|-------------|-------------|--------------|-------------|----------|------|
|    | 24,24-difluoro-1alpha-hydroxycholecalciferol                                                                      |             |             |              |             |          |      |
| LC | 26,27-diethyl-1alpha,25-dihydroxy-22-thiavitamin D3 /<br>26,27-diethyl-1alpha,25-dihydroxy-22-thiacholecalciferol | 4.24748918  | 1.51695535  | 1.671134777  | 1.211035799 | 0.008703 | Up   |
| LC | 2-hydroxy-eicosanoic acid                                                                                         | 6.905084599 | 0.963141007 | 5.581534084  | 0.328696867 | 0.018313 | Up   |
| LC | 2-oxo-heneicosanoic acid                                                                                          | 6.591858699 | 0.730413926 | 7.391788821  | 0.239502836 | 0.02891  | Down |
| LC | 3alpha,7beta,12alpha-Trihydroxy-6-oxo-5alpha-cholan-24-oic Acid                                                   | 6.068329723 | 0.693002979 | 5.061231305  | 0.799632299 | 0.041955 | Up   |
| LC | 3'-Deoxydryopterigic acid                                                                                         | 5.598663335 | 0.372146178 | 4.763743868  | 0.632205037 | 0.019193 | Up   |
| LC | 3E,5E-tridecadienoic acid                                                                                         | 5.227284365 | 0.087678174 | 5.049726723  | 0.050617949 | 0.001571 | Up   |
| LC | 3-O-alpha-L-rhamnopyranosyl-3-hydroxydecanoyl-3-hydroxydecanoic acid                                              | 3.865765138 | 1.854935226 | 1.364227275  | 1.600686614 | 0.031398 | Up   |
| LC | 4-[5]-ladderane-butanoic acid                                                                                     | 5.66722091  | 0.117264255 | 5.538652159  | 0.040606031 | 0.029475 | Up   |
| LC | 4'-Hydroxy-4-(4-hydroxystyryl)-5,7-dimethoxyflavan                                                                | 10.93288342 | 0.436399272 | 9.851709764  | 0.936690003 | 0.028236 | Up   |
| LC | 6Z,9Z-Pentacosadiene                                                                                              | 2.498158507 | 0.551675697 | 3.08384504   | 0.279506573 | 0.042791 | Down |
| LC | 7-Dehydrocholesterol                                                                                              | 5.826753284 | 0.900022773 | 7.107797771  | 0.962498681 | 0.038529 | Down |
| LC | 9,10-DHOME                                                                                                        | 7.335574515 | 0.502663081 | 6.366030474  | 0.887636309 | 0.042184 | Up   |
| LC | 9S,10S,11R-trihydroxy-12Z,15Z-octadecadienoic acid                                                                | 4.148373944 | 2.086764639 | 1.898013376  | 1.249945546 | 0.04688  | Up   |
| LC | 9Z,11E,13-Tetradecatrienal                                                                                        | 4.69595241  | 0.825179524 | 5.910047598  | 0.978710872 | 0.042548 | Down |
| LC | Acetaldehyde                                                                                                      | 1.415782329 | 1.301073846 | -0.635576542 | 0.788195259 | 0.007971 | Up   |
| LC | Adenosine triphosphate                                                                                            | 8.518493879 | 0.572560149 | 9.33571554   | 0.234240864 | 0.008932 | Down |
| LC | alpha-tocopheronic acid                                                                                           | 4.120096906 | 1.546029995 | 2.488051012  | 0.853320815 | 0.047061 | Up   |
| LC | C17 Sphinganine-1-phosphate                                                                                       | 2.815656    | 0.660467073 | 3.521138346  | 0.387947797 | 0.047688 | Down |
| LC | Ceramide (d18:1/18:0)                                                                                             | 4.527556798 | 0.647561758 | 3.680899624  | 0.606980839 | 0.041579 | Up   |
| LC | Ceramide (d18:1/20:0)                                                                                             | 3.614442269 | 0.616845131 | 2.677106213  | 0.48473903  | 0.015128 | Up   |
| LC | DG(14:0/18:3(6Z,9Z,12Z)/0:0)                                                                                      | 3.635890869 | 0.771616892 | 4.547822234  | 0.536049118 | 0.038777 | Down |
| LC | DG(18:2(9Z,12Z)/22:6(4Z,7Z,10Z,13Z,16Z,19Z)/0:0)                                                                  | 4.686519379 | 1.379502202 | 3.099840672  | 0.717059034 | 0.031457 | Up   |
| LC | Digoxin                                                                                                           | 5.416674126 | 1.998536701 | 2.212605794  | 1.366610122 | 0.008845 | Up   |

|    |                                                                     |             |             |             |             |          |      |
|----|---------------------------------------------------------------------|-------------|-------------|-------------|-------------|----------|------|
| LC | D-Limonene                                                          | 0.767782468 | 0.932865433 | 1.903921999 | 0.626525953 | 0.032736 | Down |
| LC | Dodecanoic acid                                                     | 3.699259001 | 0.360421922 | 3.306331973 | 0.231774292 | 0.048502 | Up   |
| LC | Estriol 3-sulfate 16-glucuronide                                    | 4.2624771   | 0.699817284 | 3.442707082 | 0.445222564 | 0.036004 | Up   |
| LC | farnesyl triphosphate                                               | 0.109060533 | 1.166237027 | 1.784646586 | 0.221990547 | 0.006151 | Down |
| LC | fumagillin                                                          | 4.859467493 | 0.129622566 | 4.563636706 | 0.194205414 | 0.011184 | Up   |
| LC | Gama-Tocopherol                                                     | 1.330349072 | 0.613929459 | 2.278569339 | 0.501037515 | 0.015014 | Down |
| LC | Glepidotin C                                                        | 12.05640962 | 0.061417842 | 11.98624752 | 0.04535958  | 0.048106 | Up   |
| LC | Heneicosanedioic acid                                               | 4.401435658 | 0.432487564 | 4.832703334 | 0.180148565 | 0.047789 | Down |
| LC | Hippuristanolide                                                    | 5.52384203  | 3.429849577 | 7.210521435 | 0.144762955 | 0.024975 | Down |
| LC | Indolelactic acid                                                   | 1.735393665 | 0.566514613 | 3.343476502 | 1.461021015 | 0.030718 | Down |
| LC | Kazinol H                                                           | 6.814089289 | 0.352143133 | 7.275954584 | 0.213687033 | 0.024497 | Down |
| LC | LysoPC(14:0)                                                        | 4.276911745 | 3.467341414 | 6.228959394 | 0.3096004   | 0.037373 | Down |
| LC | LysoPC(18:0)                                                        | 8.506799964 | 2.772639332 | 9.971656069 | 0.101988139 | 0.016309 | Down |
| LC | LysoPC(18:1(9Z))                                                    | 10.96183509 | 3.721491252 | 12.64921185 | 0.040039418 | 0.037373 | Down |
| LC | LysoPC(18:1(9Z))                                                    | 12.54694566 | 2.902816253 | 14.02895083 | 0.089661106 | 0.016309 | Down |
| LC | LysoPC(20:4(5Z,8Z,11Z,14Z))                                         | 8.681220293 | 2.907825622 | 10.42031183 | 0.479235026 | 0.024975 | Down |
| LC | LysoPC(20:4(5Z,8Z,11Z,14Z))                                         | 11.14946889 | 0.284815008 | 11.80959917 | 0.565673337 | 0.028709 | Down |
| LC | methyl 8-[2-(2-formyl-vinyl)-3-hydroxy-5-oxo-cyclopentyl]-octanoate | 11.11784573 | 0.069398021 | 11.0411855  | 0.047265314 | 0.049305 | Up   |
| LC | Mevalonic acid                                                      | 3.439352941 | 1.788487646 | 1.123990385 | 1.698871181 | 0.044317 | Up   |
| LC | MG(18:0/0:0/0:0)[rac]                                               | 7.016377528 | 0.530048051 | 7.766264715 | 0.198316114 | 0.008784 | Down |
| LC | MGDG(16:0/18:2(9Z,12Z))                                             | 4.367430218 | 0.484087832 | 3.746768602 | 0.417973544 | 0.038805 | Up   |
| LC | Mutisianthol                                                        | 2.22139761  | 0.761814219 | 3.163613613 | 0.571549055 | 0.035856 | Down |
| LC | N-(6-aminohexanoyl)-6-aminohexanoic acid                            | 2.556130218 | 0.620373758 | 1.526470358 | 0.593419535 | 0.01484  | Up   |
| LC | N-methyl arachidonoyl amine                                         | 1.162949147 | 0.201138783 | 0.796988699 | 0.348071027 | 0.049855 | Up   |
| LC | Ophionin                                                            | 2.088920621 | 0.201492228 | 2.610287544 | 0.412006064 | 0.019301 | Down |



|    |                                                   |             |             |             |             |          |      |
|----|---------------------------------------------------|-------------|-------------|-------------|-------------|----------|------|
| LC | PA(16:0/0:0)                                      | 3.031584893 | 0.190804557 | 3.861777651 | 0.243750869 | 6.32E-05 | Down |
| LC | PA(17:1(9Z)/22:2(13Z,16Z))                        | 2.568307486 | 0.294057789 | 2.953476425 | 0.146120135 | 0.016576 | Down |
| LC | PA(18:0/0:0)                                      | 1.630664111 | 0.781123553 | 2.876939166 | 0.390430278 | 0.005767 | Down |
| LC | PA(18:0/0:0)                                      | 3.54593137  | 0.201894865 | 3.796922365 | 0.054595896 | 0.027427 | Down |
| LC | PA(20:1(11Z)/0:0)                                 | 2.048681816 | 0.301030788 | 2.465749965 | 0.210692796 | 0.019439 | Down |
| LC | PA(22:1(11Z)/0:0)                                 | 4.66257963  | 0.354097175 | 5.083961503 | 0.158052551 | 0.023825 | Down |
| LC | PA(P-18:0/0:0)                                    | 2.804413888 | 1.173462446 | 4.146617908 | 0.831818777 | 0.045344 | Down |
| LC | PC(10:0/10:0)                                     | 4.905798884 | 0.189838859 | 5.099166744 | 0.083737784 | 0.045568 | Down |
| LC | PC(14:1(9Z)/24:1(15Z))                            | 4.181542033 | 0.102464746 | 4.034237272 | 0.107645031 | 0.035578 | Up   |
| LC | PC(16:0/3:1(2E))                                  | 3.975868837 | 3.062749834 | 5.71843867  | 0.354202507 | 0.037373 | Down |
| LC | PC(16:0/O-1:0)                                    | 9.328539527 | 0.328661544 | 9.738837479 | 0.273512761 | 0.040608 | Down |
| LC | PC(17:0/0:0)                                      | 9.51237883  | 3.941660191 | 11.39461644 | 0.081327869 | 0.024975 | Down |
| LC | PC(17:1(10Z)/0:0)                                 | 9.982782301 | 0.192283181 | 10.21466298 | 0.035801177 | 0.031083 | Down |
| LC | PC(18:1(9E)/2:0)                                  | 10.57858672 | 2.624350067 | 11.94529443 | 0.088184798 | 0.037373 | Down |
| LC | PC(22:4(7Z,10Z,13Z,16Z)/P-18:0)                   | 11.05590898 | 2.695568    | 12.68946475 | 0.484990888 | 0.037373 | Down |
| LC | PC(7:0/0:0)                                       | 4.512885047 | 2.640059044 | 1.671363503 | 1.6501728   | 0.04937  | Up   |
| LC | PE(12:0/15:1(9Z))                                 | 5.381735962 | 1.176707687 | 3.920848023 | 0.580902212 | 0.021307 | Up   |
| LC | PE(18:2(9Z,12Z)/20:5(5Z,8Z,11Z,14Z,17Z))          | 5.426312295 | 0.741073976 | 6.156796064 | 0.285804714 | 0.047955 | Down |
| LC | PE(18:2(9Z,12Z)/22:6(4Z,7Z,10Z,13Z,16Z,19Z))      | 7.537216648 | 0.472616156 | 8.40201123  | 0.6443376   | 0.024275 | Down |
| LC | PE(18:4(6Z,9Z,12Z,15Z)/22:5(4Z,7Z,10Z,13Z,16Z))   | 3.699666271 | 0.880471787 | 4.875766853 | 0.809782513 | 0.036793 | Down |
| LC | PE(20:4(5Z,8Z,11Z,14Z)/0:0)                       | 1.236742202 | 1.212537104 | 2.587113449 | 0.347432959 | 0.04063  | Down |
| LC | PE(20:4(5Z,8Z,11Z,14Z)/0:0)                       | 3.890172491 | 0.327272686 | 4.45513581  | 0.311557082 | 0.011991 | Down |
| LC | PE(22:4(7Z,10Z,13Z,16Z)/0:0)                      | 8.669080271 | 0.295562334 | 9.342885735 | 0.56099126  | 0.026359 | Down |
| LC | PE(O-16:0/21:0)                                   | 9.67205635  | 1.042865526 | 8.075622916 | 1.35223403  | 0.045018 | Up   |
| LC | Pelargonidin 3-(6''-malonylglucoside)-5-glucoside | 5.103405889 | 0.215926996 | 5.679795888 | 0.330033912 | 0.005013 | Down |

|    |                                         |             |             |              |             |          |      |
|----|-----------------------------------------|-------------|-------------|--------------|-------------|----------|------|
| LC | Pelargonidin 3-sambubioside-5-glucoside | 4.249210614 | 0.532275054 | 4.841017484  | 0.373106594 | 0.049832 | Down |
| LC | PI(18:2(9Z,12Z)/0:0)                    | 4.884709762 | 0.399491531 | 5.432173611  | 0.301321597 | 0.023095 | Down |
| LC | Prostaglandin E2                        | 8.855826169 | 0.055409626 | 8.777439562  | 0.053913854 | 0.032344 | Up   |
| LC | Protorifamycin I                        | 6.081389595 | 0.280802175 | 6.47056095   | 0.080009177 | 0.017972 | Down |
| LC | PS(10:0/10:0)                           | 3.133215461 | 3.446281844 | -0.891346601 | 2.650415114 | 0.04677  | Up   |
| LC | Sphingosine-1-phosphocholine            | 5.275863386 | 1.157139922 | 4.08216185   | 0.584976456 | 0.047764 | Up   |
| LC | undecaprenyl phosphate                  | 4.304941907 | 0.793637054 | 5.348946972  | 0.553609193 | 0.024616 | Down |
| LC | Xestoaminol C                           | 10.63753523 | 0.11813885  | 10.4590454   | 0.091594255 | 0.015177 | Up   |

**Sup Table 4e. Metabolomic analysis of liver samples obtained from DL and HC groups.**

| Platform | Metabolites                                                                                                                          | Relative Abundance in DL monkeys |             | Relative Abundance in HC monkeys |             | P value  | DL/CON  |
|----------|--------------------------------------------------------------------------------------------------------------------------------------|----------------------------------|-------------|----------------------------------|-------------|----------|---------|
| GC/LC    | Name                                                                                                                                 | Mean                             | Std         | Mean                             | Std         |          | UP/DOWN |
| GC       | Creatinine                                                                                                                           | 4.755754777                      | 0.833425    | 3.356834589                      | 0.915646    | 0.01987  | Up      |
| LC       | (+)-Hirusten-12-oic acid                                                                                                             | 3.145669091                      | 0.247748067 | 3.611543031                      | 0.373305999 | 0.029012 | Down    |
| LC       | (+)-Myristinin A                                                                                                                     | 3.874071679                      | 0.215202398 | 4.123213206                      | 0.161000324 | 0.046518 | Down    |
| LC       | (21-Methyl-8Z-pentatriacontene                                                                                                       | 6.18448845                       | 0.151436129 | 6.472488974                      | 0.245830657 | 0.034653 | Down    |
| LC       | 11alpha-(4-dimethylaminophenyl)-1alpha,25-dihydroxyvitamin D3<br>/11alpha-(4-dimethylaminophenyl)-1alpha,25-dihydroxycholecalciferol | 5.367093613                      | 0.259775291 | 5.665547949                      | 0.19572622  | 0.048373 | Down    |
| LC       | 1-Heptene                                                                                                                            | 10.96319316                      | 0.159835602 | 11.22713709                      | 0.217951314 | 0.037824 | Down    |
| LC       | 2,5-dimethyl-2E-tridecenoic acid                                                                                                     | 5.617018677                      | 0.172033314 | 5.826805876                      | 0.143781437 | 0.044864 | Down    |
| LC       | 21-hydroxy-heneicosanoic acid                                                                                                        | 4.973173956                      | 0.69992136  | 3.419582949                      | 0.981228895 | 0.010204 | Up      |
| LC       | 2-amino-14,16-dimethyloctadecan-3-ol                                                                                                 | 4.60185269                       | 0.313779946 | 4.197152016                      | 0.293017808 | 0.043581 | Up      |
| LC       | 2E,4E,6E-Nonatrienal                                                                                                                 | 5.394928788                      | 0.203489176 | 5.790657976                      | 0.287133413 | 0.020326 | Down    |
| LC       | 2E-Hexene                                                                                                                            | 6.649429739                      | 0.168725925 | 6.924661061                      | 0.239850457 | 0.044332 | Down    |
| LC       | 2-hydroxy behenic                                                                                                                    | 7.901366728                      | 1.495168293 | 5.817634926                      | 1.355494277 | 0.029917 | Up      |
| LC       | 2-oxo-tricosanoic acid                                                                                                               | 3.682304887                      | 0.536976633 | 2.881307717                      | 0.664106524 | 0.044453 | Up      |
| LC       | 3,5-Di-O-methyl-8-prenylafzelechin-4beta-ol                                                                                          | -0.071888031                     | 0.734524271 | 0.742496569                      | 0.39147743  | 0.044858 | Down    |
| LC       | 3,5-Di-O-methyl-8-prenylafzelechin-4beta-ol                                                                                          | 10.41359902                      | 0.229479773 | 10.84391833                      | 0.237334897 | 0.009608 | Down    |
| LC       | 3,7,11,15-Tetramethyl-6,10,14-hexadecatrien-1-ol                                                                                     | 4.0918842                        | 0.16622028  | 4.326940414                      | 0.180497597 | 0.040885 | Down    |
| LC       | 3alpha,12alpha-Dihydroxy-6-oxo-5beta-chole-7-en-24-oic Acid                                                                          | 3.889238211                      | 0.217980893 | 4.186602743                      | 0.226322167 | 0.042915 | Down    |
| LC       | 4,2',4'-Trihydroxy-3-methoxydihydrochalcone                                                                                          | 4.547088824                      | 0.143137862 | 4.720210923                      | 0.124827902 | 0.049605 | Down    |
| LC       | 4-Heptanone                                                                                                                          | 5.855591056                      | 0.155739878 | 6.103350761                      | 0.183507712 | 0.030311 | Down    |

|    |                                                         |             |             |             |             |          |      |
|----|---------------------------------------------------------|-------------|-------------|-------------|-------------|----------|------|
| LC | 6-[3]-ladderane-1-hexanol                               | 5.913590415 | 0.605592777 | 6.872925113 | 0.651196204 | 0.024629 | Down |
| LC | Anastatin A                                             | 3.047717242 | 1.289298524 | 0.995124475 | 1.353945125 | 0.02273  | Up   |
| LC | Betaine                                                 | 7.76632788  | 0.186456663 | 8.149879427 | 0.301042195 | 0.024181 | Down |
| LC | beta-vinyl acrylic acid                                 | 4.412649106 | 0.145465071 | 4.588189549 | 0.119960998 | 0.045747 | Down |
| LC | Citrulline                                              | 4.401081236 | 0.20259489  | 4.756973918 | 0.228212424 | 0.017054 | Down |
| LC | Cucurbitacin H                                          | 4.556205862 | 0.163275538 | 4.838100543 | 0.20335133  | 0.024408 | Down |
| LC | DG(14:1(9Z)/22:6(4Z,7Z,10Z,13Z,16Z,19Z)/0:0)            | 3.91603217  | 0.265895255 | 4.38370013  | 0.436357564 | 0.048852 | Down |
| LC | DG(20:4(5Z,8Z,11Z,14Z)/22:5(4Z,7Z,10Z,13Z,16Z)/0:0)     | 2.906184859 | 0.64449171  | 3.626208156 | 0.339320363 | 0.035972 | Down |
| LC | DHA (d5)                                                | 1.931666913 | 0.751009419 | 3.12604093  | 0.689202066 | 0.016664 | Down |
| LC | dimethylallyl-diphosphate                               | 3.157651533 | 0.252517072 | 3.448374068 | 0.150075527 | 0.0358   | Down |
| LC | Docosanedioic acid                                      | 7.990474259 | 0.198848924 | 8.246861331 | 0.19260771  | 0.046686 | Down |
| LC | Epinephrine sulfate                                     | 2.466992259 | 0.314418462 | 1.996251311 | 0.390049536 | 0.044137 | Up   |
| LC | Gibberellin A53                                         | 5.727752773 | 1.114453308 | 4.09127489  | 1.024943833 | 0.024419 | Up   |
| LC | m-Cresol                                                | 5.964669464 | 0.158720521 | 6.194577822 | 0.15250208  | 0.028446 | Down |
| LC | N-methyl arachidonoyl amine                             | 3.465922496 | 0.392006664 | 4.001135353 | 0.408996627 | 0.043204 | Down |
| LC | N-palmitoyl methionine                                  | 5.034008188 | 0.758904456 | 3.105101567 | 1.564845889 | 0.021682 | Up   |
| LC | PC(16:0/16:0)                                           | 12.63443702 | 0.243539437 | 12.9445153  | 0.212982486 | 0.040805 | Down |
| LC | PC(16:0/5:0)                                            | 3.277841303 | 0.951325006 | 1.736384522 | 1.262688169 | 0.038069 | Up   |
| LC | PC(18:0/22:5(7Z,10Z,13Z,16Z,19Z))                       | 8.435934254 | 0.264356605 | 8.882805927 | 0.292572109 | 0.019585 | Down |
| LC | PC(18:0/22:5(7Z,10Z,13Z,16Z,19Z))                       | 7.108979363 | 0.199419454 | 7.421156722 | 0.196191515 | 0.021069 | Down |
| LC | PC(18:2(9Z,12Z)/20:5(5Z,8Z,11Z,14Z,17Z))                | 12.07677765 | 0.588313787 | 12.81956011 | 0.487018906 | 0.038463 | Down |
| LC | PE(14:0/P-18:0)                                         | 8.20896012  | 0.356204695 | 7.438318846 | 0.533638801 | 0.014732 | Up   |
| LC | PE(20:3(8Z,11Z,14Z)/0:0)                                | 7.721269018 | 1.080688524 | 6.499011637 | 0.733402296 | 0.044835 | Up   |
| LC | PE(22:5(4Z,7Z,10Z,13Z,16Z)/22:6(4Z,7Z,10Z,13Z,16Z,19Z)) | 7.062655428 | 0.414102114 | 7.682370107 | 0.431001171 | 0.029377 | Down |
| LC | PG(14:0/0:0)                                            | 5.712565604 | 0.231999028 | 6.159345429 | 0.362568549 | 0.029239 | Down |

|    |                                              |              |             |              |             |          |      |
|----|----------------------------------------------|--------------|-------------|--------------|-------------|----------|------|
| LC | PG(16:0/22:4(7Z,10Z,13Z,16Z))                | 9.488188565  | 0.42659856  | 10.20152281  | 0.515886048 | 0.026033 | Down |
| LC | PG(18:2(9Z,12Z)/22:6(4Z,7Z,10Z,13Z,16Z,19Z)) | 12.47773589  | 0.369088063 | 13.01936949  | 0.370279788 | 0.029481 | Down |
| LC | PI(16:0/20:2(11Z,14Z))                       | 12.67783545  | 0.313886659 | 13.17114968  | 0.248420663 | 0.012925 | Down |
| LC | PI(16:0/22:5(4Z,7Z,10Z,13Z,16Z))             | 12.23839045  | 0.447113104 | 12.86950039  | 0.290407702 | 0.015845 | Down |
| LC | PI(18:0/0:0)                                 | 13.15006488  | 0.539527006 | 13.77722842  | 0.350429703 | 0.038096 | Down |
| LC | PI(20:3(8Z,11Z,14Z)/0:0)                     | 8.06085466   | 0.755975406 | 8.82473686   | 0.183144833 | 0.036965 | Down |
| LC | PI(P-18:0/19:1(9Z))                          | 5.261229461  | 0.673142137 | 6.125532778  | 0.51925707  | 0.031975 | Down |
| LC | Pregnenolone                                 | 2.474517395  | 1.036853212 | 3.880034569  | 0.874846853 | 0.029475 | Down |
| LC | Pregnenolone sulfate                         | -0.639756248 | 1.451981759 | 2.192264843  | 0.986614172 | 0.002723 | Down |
| LC | PS(O-16:0/22:6(4Z,7Z,10Z,13Z,16Z,19Z))       | 3.431450117  | 0.950210203 | 0.446313342  | 2.705602699 | 0.042179 | Up   |
| LC | Pyridoxal                                    | 3.261290071  | 0.238822453 | 3.617180405  | 0.202462544 | 0.019307 | Down |
| LC | Scillirosidin                                | 6.133644109  | 0.2428385   | 6.569080529  | 0.384968481 | 0.041105 | Down |
| LC | SM(d16:1/17:0)                               | 11.18199074  | 0.443745379 | 11.81024494  | 0.410378649 | 0.029058 | Down |
| LC | SM(d16:1/18:1)                               | 11.84003806  | 0.501650353 | 12.56888021  | 0.201113169 | 0.007969 | Down |
| LC | SM(d18:1/18:1(9Z))                           | 9.324755483  | 0.573817983 | 10.14542294  | 0.408428191 | 0.01713  | Down |
| LC | Stoloniferone F                              | 3.992290003  | 0.393766056 | 4.645946466  | 0.537188659 | 0.037067 | Down |
| LC | terpentecin                                  | 1.535482102  | 1.70562017  | -0.462535661 | 0.952593284 | 0.031169 | Up   |

**Sup Table 4f. Metabolomic analysis of prefrontal cortex samples obtained from DL and HC groups.**

| Platform | Metabolites                                                                                           | Relative Abundance in DL monkeys |             | Relative Abundance in HC monkeys |             | P value  | DL/CON  |
|----------|-------------------------------------------------------------------------------------------------------|----------------------------------|-------------|----------------------------------|-------------|----------|---------|
|          |                                                                                                       | Mean                             | Std         | Mean                             | Std         |          |         |
| GC/LC    | Name                                                                                                  |                                  |             |                                  |             |          | UP/DOWM |
| GC       | Malate                                                                                                | -5.007463818                     | 1.229998277 | 0.041624472                      | 2.076560859 | 0.000448 | Down    |
| GC       | Isochlorogenic Acid                                                                                   | -3.411974647                     | 1.110231753 | 1.367523249                      | 4.122428895 | 0.035321 | Down    |
| GC       | 2,5-Dihydroxypyrazine                                                                                 | -1.94018603                      | 1.649764629 | 2.481972932                      | 2.374589158 | 0.003807 | Down    |
| GC       | Palatinitol                                                                                           | 1.017668707                      | 2.623591436 | 4.398946296                      | 1.04106074  | 0.023668 | Down    |
| GC       | Glucose                                                                                               | -3.992870252                     | 0.74534809  | -0.892800547                     | 2.695194967 | 0.036309 | Down    |
| GC       | Adenosine                                                                                             | -4.208078062                     | 0.747952969 | -2.157627066                     | 1.62139492  | 0.025903 | Down    |
| GC       | Butylamine                                                                                            | -2.145198423                     | 0.428957316 | -2.910533879                     | 0.360499812 | 0.007419 | Up      |
| GC       | N-Acetyl-5-Hydroxytryptamine                                                                          | -3.112612162                     | 0.517747579 | -3.898072359                     | 0.375296878 | 0.013146 | Up      |
| GC       | Oxoproline                                                                                            | -1.359486827                     | 0.293851924 | -2.393950403                     | 0.559595768 | 0.002482 | Up      |
| GC       | Conduritol-Beta-Expoide                                                                               | 1.974947252                      | 0.859596622 | 0.819145182                      | 0.910095104 | 0.047247 | Up      |
| GC       | Galactinol                                                                                            | -0.011227594                     | 0.631593906 | -1.97396537                      | 1.859859788 | 0.049042 | Up      |
| LC       | 1'',2''-Dihydro-8-hydroxyisopentanyl-3'-methoxy-4'-O-methylalpinumisoflavone                          | 2.174240714                      | 1.034404428 | 0.548076134                      | 1.40314086  | 0.045397 | Up      |
| LC       | 10-oxo-docosanoic acid                                                                                | 2.308665654                      | 0.630580118 | 3.18625939                       | 0.387930199 | 0.015737 | Down    |
| LC       | 12beta-hydroxy-24-norcholesta-1,4,22E-trien-3-one                                                     | 2.632802476                      | 0.694720551 | 1.836559764                      | 0.45736033  | 0.040995 | Up      |
| LC       | 14-methyl-8-hexadecen-1-ol                                                                            | 1.736947307                      | 1.216041922 | 3.230107974                      | 0.620569587 | 0.023132 | Down    |
| LC       | 14-methyl-8-hexadecen-1-ol                                                                            | 8.486470216                      | 1.056630823 | 9.647380989                      | 0.272367006 | 0.042566 | Down    |
| LC       | 1alpha,24-dihydroxy-25,26,27-trinorvitamin D3 /<br>1alpha,24-dihydroxy-25,26,27-trinorcholecalciferol | 2.71405954                       | 0.45241845  | 1.615398912                      | 1.025634459 | 0.037271 | Up      |
| LC       | 27-nor-22R-hydroxy-5alpha-cholestan-3,6-dione                                                         | 8.104317484                      | 0.604810993 | 7.407056682                      | 0.202256033 | 0.036018 | Up      |
| LC       | 2-chlorohexadecanol                                                                                   | 4.910831381                      | 0.530111862 | 5.861975979                      | 0.612444414 | 0.01649  | Down    |

|    |                                                    |              |             |              |             |          |      |
|----|----------------------------------------------------|--------------|-------------|--------------|-------------|----------|------|
| LC | 2-fluoro-hexadecanoic acid                         | -1.29317205  | 0.466786646 | 0.408816427  | 1.808663918 | 0.049683 | Down |
| LC | 3,4-Didehydro-beta-carotene                        | 1.242767449  | 0.981840003 | 2.485417761  | 0.530291767 | 0.021276 | Down |
| LC | 3,7,11-Trimethyldodeca-2E,4E-diene                 | 6.805511842  | 0.535737599 | 5.957178377  | 0.712663293 | 0.042001 | Up   |
| LC | 3-O-alpha-L-rhamnopyranosyl-3-hydroxydecanoic acid | 3.492395611  | 0.88271149  | 4.542891093  | 0.356895427 | 0.022216 | Down |
| LC | 3Z,6Z,9Z-Pentacosatriene                           | 0.632721645  | 0.777576316 | -0.520635565 | 0.963112982 | 0.045604 | Up   |
| LC | 4,7,10,13-Docosatetraynoic acid                    | -0.329290245 | 1.224665291 | 3.351931145  | 0.954793446 | 0.000171 | Down |
| LC | 5,8,11-dodecatriynoic acid                         | 4.187546361  | 0.267137452 | 3.849939714  | 0.176891872 | 0.027366 | Up   |
| LC | 9-hexadecen-1-ol                                   | 4.102776942  | 0.181711615 | 3.833174376  | 0.160767609 | 0.021491 | Up   |
| LC | 9-pentadecen-1-ol                                  | 2.996105678  | 0.659853971 | 3.848603099  | 0.548621304 | 0.035244 | Down |
| LC | Anandamide (20:2, n-6)                             | 9.458130751  | 0.52445027  | 8.703068882  | 0.594747405 | 0.041875 | Up   |
| LC | Axillarin 7-sulfate                                | 1.476646609  | 2.21033383  | 3.798927577  | 1.187711364 | 0.046809 | Down |
| LC | CE(20:0)                                           | 1.527406973  | 0.768873356 | 2.793706578  | 0.221593711 | 0.003077 | Down |
| LC | CerP(d18:1/18:0)                                   | 6.954450753  | 0.228340717 | 7.210237543  | 0.121892112 | 0.036024 | Down |
| LC | Eicosenoic acid                                    | 4.378525147  | 0.652983208 | 1.101458408  | 1.258386414 | 0.000209 | Up   |
| LC | Glutathione                                        | 7.516087663  | 1.534924918 | 9.660844835  | 1.57594073  | 0.038083 | Down |
| LC | Grandiflorone                                      | 0.644886703  | 0.885578087 | 2.074460656  | 0.593261151 | 0.008217 | Down |
| LC | Isorhamnetin 3-glucuronide-7-sulfate               | 2.413072669  | 1.358213656 | 4.335999544  | 1.485283566 | 0.04132  | Down |
| LC | LysoPC(15:0)                                       | 1.402488893  | 0.442612552 | 2.293519337  | 0.325595149 | 0.002634 | Down |
| LC | Neomethymycin                                      | 2.370671655  | 0.066213877 | 2.107019159  | 0.240003178 | 0.026768 | Up   |
| LC | Norepinephrine                                     | 3.586172146  | 0.233876596 | 3.936338805  | 0.204214038 | 0.020042 | Down |
| LC | N-stearoyl GABA                                    | 3.440052313  | 0.618067763 | 2.285517164  | 0.842600914 | 0.022074 | Up   |
| LC | PA(22:4(7Z,10Z,13Z,16Z)/0:0)                       | 6.072664081  | 0.487160458 | 3.456764961  | 1.263874862 | 0.000803 | Up   |
| LC | PG(20:5(5Z,8Z,11Z,14Z,17Z)/0:0)                    | 0.687705705  | 1.612449015 | 2.913940469  | 0.893413977 | 0.014333 | Down |
| LC | PGE2alpha dimethyl amine                           | 6.056990698  | 0.562813805 | 5.179931873  | 0.696841073 | 0.037417 | Up   |
| LC | PI(20:1(11Z)/22:2(13Z,16Z))                        | 2.082353447  | 0.349955578 | 3.105796053  | 0.485566937 | 0.001863 | Down |

|    |                |             |             |             |             |          |      |
|----|----------------|-------------|-------------|-------------|-------------|----------|------|
| LC | plastoquinol-1 | 1.847475606 | 1.563397395 | 3.351713131 | 0.39540502  | 0.045409 | Down |
| LC | PS(12:0/0:0)   | 2.190248463 | 0.615753478 | 2.942671282 | 0.381839    | 0.029174 | Down |
| LC | PS(O-20:0/0:0) | 1.514253997 | 0.54426861  | 2.501299106 | 0.520270603 | 0.009314 | Down |
| LC | Retinoic acid  | 4.593947143 | 0.589538533 | 6.632775116 | 1.920761397 | 0.047885 | Down |



**Sup Table 4g. Metabolomic analysis of amygdala samples obtained from DL and HC groups.**

| Platform | Metabolites                                           | Relative Abundance in DL monkeys |             | Relative Abundance in HC monkeys |             | P value  | DL/CON  |
|----------|-------------------------------------------------------|----------------------------------|-------------|----------------------------------|-------------|----------|---------|
| GC/LC    | Name                                                  | Mean                             | Std         | Mean                             | Std         |          | UP/DOWM |
| GC       | Phosphoenolpyruvate                                   | -2.425821229                     | 2.658865351 | 1.212029318                      | 0.977342959 | 0.018564 | Down    |
| GC       | Conduritol-Beta-Expoide                               | 2.37685435                       | 0.832304851 | 1.183636911                      | 0.719013694 | 0.024007 | Up      |
| GC       | Lactobionic Acid                                      | -2.947803664                     | 2.283554624 | -5.396690466                     | 1.101303303 | 0.048887 | Up      |
| GC       | Galactose                                             | 0.301726949                      | 2.797944037 | -3.795353803                     | 0.917833782 | 0.014118 | Up      |
| LC       | 13E,15E,18Z,20Z-pentacosatetraen-11-ynyl acetate      | 2.404954503                      | 0.187870386 | 2.700052355                      | 0.180483489 | 0.019631 | Down    |
| LC       | 14-methyl-8-hexadecen-1-ol                            | 3.023644993                      | 1.146065872 | 4.391683691                      | 0.703628286 | 0.031893 | Down    |
| LC       | 3-Buten-2-one                                         | 1.634224191                      | 0.116801143 | 2.060346151                      | 0.450916174 | 0.048934 | Down    |
| LC       | 3-Sulfinoalanine                                      | 4.39083403                       | 0.065735785 | 4.123088034                      | 0.248468408 | 0.045434 | Up      |
| LC       | 4,8-Dimethyl-4E,8E-decadien-10-olide                  | 2.097702333                      | 0.698407873 | 3.104183145                      | 0.45706808  | 0.014444 | Down    |
| LC       | 7,4'-Dihydroxy-8-methylflavan                         | 5.362011013                      | 0.164085546 | 5.105234583                      | 0.101986997 | 0.008639 | Up      |
| LC       | 9-pentadecen-1-ol                                     | 3.719426917                      | 0.853032511 | 4.9294953                        | 0.510539135 | 0.013772 | Down    |
| LC       | Acetylcysteine                                        | 2.317600883                      | 0.782730898 | 0.950279231                      | 1.186078698 | 0.040169 | Up      |
| LC       | Arachidonic acid                                      | 5.807353839                      | 0.104817335 | 6.080420407                      | 0.15719726  | 0.005355 | Down    |
| LC       | Bismuth                                               | 1.687267394                      | 0.489230093 | 2.924674499                      | 0.598727291 | 0.002866 | Down    |
| LC       | Briantheine W                                         | -0.105903736                     | 1.294343062 | 1.165189797                      | 0.504383167 | 0.048894 | Down    |
| LC       | Butyl 4'-O-butanoyl-6-O-hexadecanoyl-neohesperidoside | 3.813350991                      | 0.19976881  | 4.14603259                       | 0.233187459 | 0.024151 | Down    |
| LC       | Daidzein                                              | 3.016518105                      | 1.162878428 | 1.39763096                       | 1.100886712 | 0.032747 | Up      |
| LC       | DG(22:2(13Z,16Z)/22:6(4Z,7Z,10Z,13Z,16Z,19Z)/0:0)     | 10.16229717                      | 0.289425528 | 10.63040075                      | 0.168016957 | 0.006479 | Down    |
| LC       | Dopamine 4-sulfate                                    | 3.801763016                      | 0.647443533 | 1.258617497                      | 2.349114445 | 0.044739 | Up      |
| LC       | Gamma-Glutamylglutamine                               | 4.518454298                      | 0.607873126 | 3.800140225                      | 0.347403922 | 0.036368 | Up      |

|    |                                      |             |             |             |             |          |      |
|----|--------------------------------------|-------------|-------------|-------------|-------------|----------|------|
| LC | Glycerophosphocholine                | 2.930720358 | 0.459622038 | 2.335633085 | 0.204714577 | 0.023419 | Up   |
| LC | Heptadecanoic acid                   | 8.713461097 | 0.541831246 | 9.716221262 | 0.353175172 | 0.003499 | Down |
| LC | Heptadecanoic acid                   | 7.461367092 | 0.169855153 | 7.200219805 | 0.216452195 | 0.042416 | Up   |
| LC | LysoPC(14:1(9Z))                     | 2.077772045 | 0.237660362 | 2.468123576 | 0.269290858 | 0.02381  | Down |
| LC | Millettocalyxin C                    | 4.13108149  | 0.222849033 | 4.548895028 | 0.242921192 | 0.011164 | Down |
| LC | Nicotinic acid                       | 6.368340111 | 0.201122221 | 6.664275765 | 0.169522041 | 0.020273 | Down |
| LC | Norgestrel                           | 2.129919646 | 0.390663076 | 2.698603555 | 0.467483667 | 0.045284 | Down |
| LC | PC(20:1(11Z)/P-18:1(11Z))            | 4.546941678 | 0.211077319 | 4.83442445  | 0.213877297 | 0.041099 | Down |
| LC | PC(O-10:1(9E)/2:0)                   | 7.959293159 | 0.088069182 | 8.148286778 | 0.157814553 | 0.028298 | Down |
| LC | PE(14:0/22:6(4Z,7Z,10Z,13Z,16Z,19Z)) | 3.584022363 | 0.954132886 | 1.649014741 | 1.420768914 | 0.019804 | Up   |
| LC | PE(20:4(5Z,8Z,11Z,14Z)/P-16:0)       | 9.598326933 | 0.372848632 | 10.01299292 | 0.145919726 | 0.029522 | Down |
| LC | PG(22:4(7Z,10Z,13Z,16Z)/0:0)         | 4.285487604 | 0.652906464 | 2.183019355 | 2.191262426 | 0.047986 | Up   |
| LC | PI(O-18:0/0:0)                       | 1.97395873  | 0.377833536 | 2.479800171 | 0.297805009 | 0.027628 | Down |
| LC | Pilosanol A                          | 5.571490815 | 0.363018525 | 6.008354628 | 0.257098968 | 0.036962 | Down |
| LC | Pristanic acid                       | 7.624941282 | 0.610684846 | 8.621285719 | 0.417056124 | 0.008011 | Down |
| LC | Pristanic acid                       | 5.474680665 | 0.504935742 | 4.864983248 | 0.430295685 | 0.048085 | Up   |

**Sup Table 5a. Metabolite count in metabolomic WGCNA modules.**

---

| <b>Module</b> | <b>n . Metabolites</b> |
|---------------|------------------------|
| Black         | 25                     |
| Blue          | 306                    |
| Brown         | 62                     |
| Green         | 33                     |
| Grey          | 1                      |
| Pink          | 24                     |
| Red           | 32                     |
| Yellow        | 33                     |

---

**Sup Table 5b. Detailed information of 4 metabolic modules.**

| Module | Location  | Metabolite                                    | Platform | Database ID  |
|--------|-----------|-----------------------------------------------|----------|--------------|
| black  | amygdala  | Heptadecanoic acid                            | LC       | HMDB02259    |
| black  | intestine | Uracil                                        | GC       | HMDB0000300  |
| black  | intestine | Oleic acid                                    | LC       | HMDB00207    |
| black  | intestine | Uridine 5'-monophosphate                      | LC       | HMDB00288    |
| black  | intestine | LysoPC(20:0)                                  | LC       | HMDB10390    |
| black  | intestine | N-linolenoyl-glutamine                        | LC       | LMFA0000004  |
| black  | intestine | 13,14-dihydroxy-docosanoic acid               | LC       | LMFA01050211 |
| black  | intestine | 2-aminomuconic acid semialdehyde              | LC       | LMFA01060191 |
| black  | intestine | diamino-pimelic acid                          | LC       | LMFA01170102 |
| black  | intestine | 15-HETE-DA                                    | LC       | LMFA08020151 |
| black  | intestine | PC(18:0/2:0)                                  | LC       | LMGP01010779 |
| black  | intestine | PC(O-12:0/O-2:0)                              | LC       | LMGP01040017 |
| black  | intestine | PC(O-16:0/O-2:0)                              | LC       | LMGP01040041 |
| black  | intestine | PC(O-18:0/O-2:1(1E))                          | LC       | LMGP01040056 |
| black  | intestine | PC(17:1(10Z)/0:0)                             | LC       | LMGP01050002 |
| black  | intestine | PC(O-17:0/0:0)                                | LC       | LMGP01060013 |
| black  | intestine | PE(O-18:0/O-18:0)                             | LC       | LMGP02040005 |
| black  | intestine | PE(O-20:0/0:0)                                | LC       | LMGP02060005 |
| black  | intestine | PS(O-18:0/0:0)                                | LC       | LMGP03060002 |
| black  | intestine | PA(18:1(9Z)/0:0)                              | LC       | LMGP10050008 |
| black  | intestine | Malvidin 3-glucoside-5-(6''-malonylglucoside) | LC       | LMPK12010389 |

|       |           |                                                   |    |                |
|-------|-----------|---------------------------------------------------|----|----------------|
| black | intestine | makisterone B                                     | LC | LMST01031017   |
| black | intestine | Minabeolide-1                                     | LC | LMST01160002   |
| black | feces     | fumagillin                                        | LC | LMPR0103060003 |
| black | liver     | 2-oxo-tricosanoic acid                            | LC | LMFA01060144   |
| blue  | amygdala  | Galactose                                         | GC | HMDB0000143    |
| blue  | amygdala  | Glycerophosphocholine                             | LC | HMDB000086     |
| blue  | amygdala  | Pristanic acid                                    | LC | HMDB00795      |
| blue  | amygdala  | Arachidonic acid                                  | LC | HMDB01043      |
| blue  | amygdala  | Nicotinic acid                                    | LC | HMDB01488      |
| blue  | amygdala  | Acetylcysteine                                    | LC | HMDB01890      |
| blue  | amygdala  | Bismuth                                           | LC | HMDB02196      |
| blue  | amygdala  | Heptadecanoic acid                                | LC | HMDB02259      |
| blue  | amygdala  | Dopamine 4-sulfate                                | LC | HMDB04148      |
| blue  | amygdala  | DG(22:2(13Z,16Z)/22:6(4Z,7Z,10Z,13Z,16Z,19Z)/0:0) | LC | HMDB07672      |
| blue  | amygdala  | PC(20:1(11Z)/P-18:1(11Z))                         | LC | HMDB08326      |
| blue  | amygdala  | PE(20:4(5Z,8Z,11Z,14Z)/P-16:0)                    | LC | HMDB09411      |
| blue  | amygdala  | LysoPC(14:1(9Z))                                  | LC | HMDB10380      |
| blue  | amygdala  | Gamma-Glutamylglutamine                           | LC | HMDB11738      |
| blue  | amygdala  | 14-methyl-8-hexadecen-1-ol                        | LC | LMFA05000034   |
| blue  | amygdala  | 9-pentadecen-1-ol                                 | LC | LMFA05000050   |
| blue  | amygdala  | 13E,15E,18Z,20Z-pentacosatetraen-11-ynyl acetate  | LC | LMFA07010407   |
| blue  | amygdala  | 4,8-Dimethyl-4E,8E-decadien-10-olide              | LC | LMFA07040024   |
| blue  | amygdala  | 3-Buten-2-one                                     | LC | LMFA12000018   |
| blue  | amygdala  | PC(O-10:1(9E)/2:0)                                | LC | LMGP01020145   |

|      |           |                                                       |    |              |
|------|-----------|-------------------------------------------------------|----|--------------|
| blue | amygdala  | PI(O-18:0/0:0)                                        | LC | LMGP06060002 |
| blue | amygdala  | Pilosanol A                                           | LC | LMPK12020071 |
| blue | amygdala  | 7,4'-Dihydroxy-8-methylflavan                         | LC | LMPK12020230 |
| blue | amygdala  | Millettocalyxin C                                     | LC | LMPK12110009 |
| blue | amygdala  | Butyl 4'-O-butanoyl-6-O-hexadecanoyl-neohesperidoside | LC | LMSL05000005 |
| blue | amygdala  | Norgestrel                                            | LC | LMST02030119 |
| blue | amygdala  | Conduritol-Beta-Expoxide                              | GC | NA           |
| blue | intestine | N-Carbamoylaspartate                                  | GC | HMDB0000828  |
| blue | intestine | Carnosine                                             | LC | HMDB00033    |
| blue | intestine | 5-Aminovaleric Acid                                   | GC | HMDB0003355  |
| blue | intestine | Adenosine monophosphate                               | LC | HMDB00045    |
| blue | intestine | Homovanillic acid                                     | LC | HMDB00118    |
| blue | intestine | L-Phenylalanine                                       | LC | HMDB00159    |
| blue | intestine | L-Proline                                             | LC | HMDB00162    |
| blue | intestine | Cholesterol sulfate                                   | LC | HMDB00653    |
| blue | intestine | Leukotriene B4                                        | LC | HMDB01085    |
| blue | intestine | Prostaglandin E2                                      | LC | HMDB01220    |
| blue | intestine | Guanosine monophosphate                               | LC | HMDB01397    |
| blue | intestine | Allopregnanolone                                      | LC | HMDB01449    |
| blue | intestine | Caffeine                                              | LC | HMDB01847    |
| blue | intestine | Homocysteine thiolactone                              | LC | HMDB02287    |
| blue | intestine | Coumesterol                                           | LC | HMDB02326    |
| blue | intestine | Menthol                                               | LC | HMDB03352    |
| blue | intestine | 9,12,13-TriHOME                                       | LC | HMDB04708    |

|      |           |                                                                     |    |              |
|------|-----------|---------------------------------------------------------------------|----|--------------|
| blue | intestine | Dimethyl sulfone                                                    | LC | HMDB04983    |
| blue | intestine | Topiramate                                                          | LC | HMDB05034    |
| blue | intestine | 5-HEPE                                                              | LC | HMDB05081    |
| blue | intestine | TG(16:1(9Z)/16:1(9Z)/16:1(9Z))[iso]                                 | LC | HMDB05432    |
| blue | intestine | Tetrahydrocurcumin                                                  | LC | HMDB05789    |
| blue | intestine | Iso-Valeraldehyde                                                   | LC | HMDB06478    |
| blue | intestine | PE(14:0/15:0)                                                       | LC | HMDB08823    |
| blue | intestine | PE(14:0/18:3(9Z,12Z,15Z))                                           | LC | HMDB08831    |
| blue | intestine | PE(14:1(9Z)/24:0)                                                   | LC | HMDB08881    |
| blue | intestine | PE(18:1(11Z)/18:1(11Z))                                             | LC | HMDB09025    |
| blue | intestine | LysoPC(22:1(13Z))                                                   | LC | HMDB10399    |
| blue | intestine | Cer(d18:0/25:0)                                                     | LC | HMDB11770    |
| blue | intestine | PS(18:1(9Z)/20:4(5Z,8Z,11Z,14Z))                                    | LC | HMDB12394    |
| blue | intestine | Hydroxyphthioceranic acid (C31)                                     | LC | LMFA01020320 |
| blue | intestine | 26:5(11Z,14Z,17Z,20Z,23Z)                                           | LC | LMFA01030831 |
| blue | intestine | 24:3(15Z,18Z,21Z)                                                   | LC | LMFA01030902 |
| blue | intestine | methyl 8-[2-(2-formyl-vinyl)-3-hydroxy-5-oxo-cyclopentyl]-octanoate | LC | LMFA01050151 |
| blue | intestine | 2-keto-n-caprylic acid                                              | LC | LMFA01060016 |
| blue | intestine | 3-keto-n-caprylic acid                                              | LC | LMFA01060017 |
| blue | intestine | 3-hydroxy-suberic acid                                              | LC | LMFA01170093 |
| blue | intestine | 13-keto-9Z,11E,15Z-octadecatrienoic acid                            | LC | LMFA02000028 |
| blue | intestine | PGF2alpha-11-acetate                                                | LC | LMFA03010096 |
| blue | intestine | PGF2alpha-EA(d4)                                                    | LC | LMFA03010207 |
| blue | intestine | PGH2-EA                                                             | LC | LMFA03010219 |

|      |           |                                                                       |    |              |
|------|-----------|-----------------------------------------------------------------------|----|--------------|
| blue | intestine | Resolvin D1                                                           | LC | LMFA04000006 |
| blue | intestine | 13-tetradecen-2,4-diyn-1-ol                                           | LC | LMFA05000016 |
| blue | intestine | 14-methyl-8-hexadecen-1-ol                                            | LC | LMFA05000034 |
| blue | intestine | 2,6,8,12-Tetramethyl-2,4-tridecadien-1-ol                             | LC | LMFA05000170 |
| blue | intestine | 12,13-Dimethyl-5,14-dioxabicyclo[9.2.1]-tetradeca-1(13),11-dien-4-one | LC | LMFA07040039 |
| blue | intestine | N,N-(2,2-dihydroxy-ethyl) arachidonoyl amine                          | LC | LMFA08020028 |
| blue | intestine | N-stearoyl GABA                                                       | LC | LMFA08020106 |
| blue | intestine | 7-Ethyl-3,11-dimethyl-1,3Z,6E,10-tridecatetraene                      | LC | LMFA11000124 |
| blue | intestine | 3Z,6Z,9Z,12Z,15Z-Tricosapentaene                                      | LC | LMFA11000180 |
| blue | intestine | 11-Methylhexacosane                                                   | LC | LMFA11000214 |
| blue | intestine | 1-Octacosene                                                          | LC | LMFA11000324 |
| blue | intestine | TG(12:0/12:0/18:1(9Z))[iso3]                                          | LC | LMGL03012638 |
| blue | intestine | PC(16:0/2:0)                                                          | LC | LMGP01010612 |
| blue | intestine | PC(18:1(9Z)/4:0)                                                      | LC | LMGP01010916 |
| blue | intestine | PC(O-16:0/O-18:1(9Z))                                                 | LC | LMGP01040039 |
| blue | intestine | PC(O-6:0/O-6:0)                                                       | LC | LMGP01040078 |
| blue | intestine | PC(19:1(9Z)/0:0)                                                      | LC | LMGP01050130 |
| blue | intestine | PC(O-16:0/0:0)                                                        | LC | LMGP01060010 |
| blue | intestine | PS(22:1(11Z)/0:0)                                                     | LC | LMGP03050023 |
| blue | intestine | PG(20:2(11Z,14Z)/22:4(7Z,10Z,13Z,16Z))                                | LC | LMGP04010587 |
| blue | intestine | PG(22:4(7Z,10Z,13Z,16Z)/0:0)                                          | LC | LMGP04050017 |
| blue | intestine | PI(20:4(5Z,8Z,11Z,14Z)/16:1(9Z))                                      | LC | LMGP06010594 |
| blue | intestine | PI(O-18:0/0:0)                                                        | LC | LMGP06060002 |
| blue | intestine | PA(O-16:0/14:0)                                                       | LC | LMGP10020004 |



|      |           |                                                                        |    |                |
|------|-----------|------------------------------------------------------------------------|----|----------------|
| blue | intestine | PA(P-16:0/15:1(9Z))                                                    | LC | LMGP10030006   |
| blue | intestine | 5-Carboxypyranocyanidin 3-O-beta-glucopyranoside                       | LC | LMPK12010432   |
| blue | intestine | Dehydrodolineone                                                       | LC | LMPK12060060   |
| blue | intestine | 5,7,3',5'-Tetrahydroxy-3,6,8,4'-tetramethoxyflavone                    | LC | LMPK12113358   |
| blue | intestine | Thonningianin B                                                        | LC | LMPK12120466   |
| blue | intestine | 5,7,4'-Trihydroxyflavanone 7-sulfate                                   | LC | LMPK12140327   |
| blue | intestine | 3'-O-methylbatatasin III                                               | LC | LMPK13090040   |
| blue | intestine | Chamazulene                                                            | LC | LMPR0103410002 |
| blue | intestine | 8beta-Hydroxy-3-longipinen-5-one                                       | LC | LMPR0103490002 |
| blue | intestine | 3S-squalene-2,3-epoxide                                                | LC | LMPR0106010010 |
| blue | intestine | Prosafrinine                                                           | LC | LMSP01080051   |
| blue | intestine | GlcCer(d16:1/23:0)                                                     | LC | LMSP0501AA31   |
| blue | intestine | 3beta-Hydroxy-5alpha,6alpha-epoxy-9-oxo-9,10-seco-5-cholest-7-en-11-al | LC | LMST01010120   |
| blue | intestine | zymosterol intermediate 1c                                             | LC | LMST01010170   |
| blue | intestine | 12beta,16beta,20R-trihydroxy-cholest-1,4-dien-3-one                    | LC | LMST01010339   |
| blue | intestine | (23S)-1alpha-hydroxy-25,27-didehydrovitamin D3 26,23-lactone           | LC | LMST03020599   |
| blue | intestine | Hydroxycarbamate                                                       | GC | NA             |
| blue | intestine | Digalacturonic Acid                                                    | GC | NA             |
| blue | intestine | Fructose-1,6-Bisphosphate                                              | GC | NA             |
| blue | intestine | Mannonic Acid                                                          | GC | NA             |
| blue | feces     | 3-arylcarbonyl-alanine                                                 | GC | C03450         |
| blue | feces     | sarcosine                                                              | GC | HMDB0000271    |
| blue | feces     | galactose-6-phosphate                                                  | GC | HMDB0000645    |
| blue | feces     | Mevalonic acid                                                         | LC | HMDB00227      |

|      |       |                                                              |    |              |
|------|-------|--------------------------------------------------------------|----|--------------|
| blue | feces | Adenosine triphosphate                                       | LC | HMDB00538    |
| blue | feces | Indolelactic acid                                            | LC | HMDB00671    |
| blue | feces | Acetaldehyde                                                 | LC | HMDB00990    |
| blue | feces | Prostaglandin E2                                             | LC | HMDB01220    |
| blue | feces | Digoxin                                                      | LC | HMDB01917    |
| blue | feces | D-Limonene                                                   | LC | HMDB03375    |
| blue | feces | 9,10-DHOME                                                   | LC | HMDB04704    |
| blue | feces | Ceramide (d18:1/18:0)                                        | LC | HMDB04950    |
| blue | feces | DG(14:0/18:3(6Z,9Z,12Z)/0:0)                                 | LC | HMDB07017    |
| blue | feces | DG(18:2(9Z,12Z)/22:6(4Z,7Z,10Z,13Z,16Z,19Z)/0:0)             | LC | HMDB07266    |
| blue | feces | PC(14:1(9Z)/24:1(15Z))                                       | LC | HMDB07927    |
| blue | feces | PE(18:2(9Z,12Z)/20:5(5Z,8Z,11Z,14Z,17Z))                     | LC | HMDB09104    |
| blue | feces | PE(18:2(9Z,12Z)/22:6(4Z,7Z,10Z,13Z,16Z,19Z))                 | LC | HMDB09111    |
| blue | feces | PE(18:4(6Z,9Z,12Z,15Z)/22:5(4Z,7Z,10Z,13Z,16Z))              | LC | HMDB09208    |
| blue | feces | 12,13-DiHODE                                                 | LC | HMDB10201    |
| blue | feces | Estriol 3-sulfate 16-glucuronide                             | LC | HMDB10356    |
| blue | feces | LysoPC(20:4(5Z,8Z,11Z,14Z))                                  | LC | HMDB10395    |
| blue | feces | 13-chloro-docosane-1,14-disulfate                            | LC | LMFA00000017 |
| blue | feces | 3E,5E-tridecadienoic acid                                    | LC | LMFA01030244 |
| blue | feces | 2-hydroxy-eicosanoic acid                                    | LC | LMFA01050073 |
| blue | feces | 4-[5]-ladderane-butanoic acid                                | LC | LMFA01140011 |
| blue | feces | 9S,10S,11R-trihydroxy-12Z,15Z-octadecadienoic acid           | LC | LMFA02000021 |
| blue | feces | (-)-11-hydroxy-9,10-dihydrojasmonic acid 11-beta-D-glucoside | LC | LMFA02020014 |
| blue | feces | 15-deoxy-delta-12,14-PGJ2-d4                                 | LC | LMFA03010177 |

|      |       |                                                    |    |                |
|------|-------|----------------------------------------------------|----|----------------|
| blue | feces | 9Z,11E,13-Tetradecatrienal                         | LC | LMFA06000182   |
| blue | feces | 6Z,9Z-Pentacosadiene                               | LC | LMFA11000143   |
| blue | feces | MGDG(16:0/18:2(9Z,12Z))                            | LC | LMGL05010026   |
| blue | feces | PC(10:0/10:0)                                      | LC | LMGP01010380   |
| blue | feces | PC(17:1(10Z)/0:0)                                  | LC | LMGP01050002   |
| blue | feces | PC(16:0/O-1:0)                                     | LC | LMGP01080021   |
| blue | feces | PE(12:0/15:1(9Z))                                  | LC | LMGP02010361   |
| blue | feces | PE(20:4(5Z,8Z,11Z,14Z)/0:0)                        | LC | LMGP02050009   |
| blue | feces | PI(18:2(9Z,12Z)/0:0)                               | LC | LMGP06050010   |
| blue | feces | PA(18:0/0:0)                                       | LC | LMGP10050005   |
| blue | feces | PA(16:0/0:0)                                       | LC | LMGP10050006   |
| blue | feces | PA(20:1(11Z)/0:0)                                  | LC | LMGP10050026   |
| blue | feces | PA(22:1(11Z)/0:0)                                  | LC | LMGP10050029   |
| blue | feces | PA(P-18:0/0:0)                                     | LC | LMGP10070002   |
| blue | feces | Protorifamycin I                                   | LC | LMPK05000007   |
| blue | feces | Pelargonidin 3-(6"-malonylglucoside)-5-glucoside   | LC | LMPK12010038   |
| blue | feces | Ophionin                                           | LC | LMPK12010354   |
| blue | feces | Kazinol H                                          | LC | LMPK12020242   |
| blue | feces | 4'-Hydroxy-4-(4-hydroxystyryl)-5,7-dimethoxyflavan | LC | LMPK12020274   |
| blue | feces | (E)-4-Nitrostilbene                                | LC | LMPK13090020   |
| blue | feces | (6S)-dehydrovomifoliol                             | LC | LMPR0103050009 |
| blue | feces | Mutisianthol                                       | LC | LMPR0103360001 |
| blue | feces | undecaprenyl phosphate                             | LC | LMPR03020001   |
| blue | feces | C17 Sphinganine-1-phosphate                        | LC | LMSP01040005   |

|      |             |                                                                                        |    |              |
|------|-------------|----------------------------------------------------------------------------------------|----|--------------|
| blue | feces       | Sphingosine-1-phosphocholine                                                           | LC | LMSP01060001 |
| blue | feces       | 24,24-difluoro-1alpha-hydroxyvitamin D3 / 24,24-difluoro-1alpha-hydroxycholecalciferol | LC | LMST03020137 |
| blue | feces       | cyanoalanine                                                                           | GC | NA           |
| blue | feces       | glycerol-1-phosphate                                                                   | GC | NA           |
| blue | feces       | 2-hydroxyglutaric acid                                                                 | GC | NA           |
| blue | hippocampus | 1-Methylhistidine                                                                      | LC | HMDB000001   |
| blue | hippocampus | Uridine                                                                                | GC | HMDB0000296  |
| blue | hippocampus | Mannose-6-Phosphate                                                                    | GC | HMDB0001078  |
| blue | hippocampus | Dimethylglycine                                                                        | LC | HMDB000092   |
| blue | hippocampus | L-Glutamic acid                                                                        | LC | HMDB00148    |
| blue | hippocampus | L-Cystine                                                                              | LC | HMDB00192    |
| blue | hippocampus | Oleic acid                                                                             | LC | HMDB00207    |
| blue | hippocampus | Glutamate                                                                              | GC | HMDB0060475  |
| blue | hippocampus | Myristic acid                                                                          | LC | HMDB00806    |
| blue | hippocampus | Vanylglycol                                                                            | LC | HMDB01490    |
| blue | hippocampus | LysoPC(18:1(9Z))                                                                       | LC | HMDB02815    |
| blue | hippocampus | 13S-hydroxyoctadecadienoic acid                                                        | LC | HMDB04667    |
| blue | hippocampus | TG(18:2(9Z,12Z)/14:0/18:3(9Z,12Z,15Z))[iso6]                                           | LC | HMDB10471    |
| blue | hippocampus | Cer(d18:0/24:0)                                                                        | LC | HMDB11768    |
| blue | hippocampus | 2E,4E,8Z,10E-dodecatetraenoic acid                                                     | LC | LMFA01030240 |
| blue | hippocampus | 10E-heptadecen-8-ynoic acid                                                            | LC | LMFA01030482 |
| blue | hippocampus | Ambrettolic acid                                                                       | LC | LMFA01050106 |
| blue | hippocampus | N-ethyl arachidonoyl amine                                                             | LC | LMFA08020006 |
| blue | hippocampus | 3,5,7-Trimethyl-2E,4E,6E,8E-undecatetraene                                             | LC | LMFA11000055 |

|      |             |                                                                                                                        |    |              |
|------|-------------|------------------------------------------------------------------------------------------------------------------------|----|--------------|
| blue | hippocampus | 9,10-Tetracosadiene                                                                                                    | LC | LMFA11000536 |
| blue | hippocampus | 3-Buten-2-one                                                                                                          | LC | LMFA12000018 |
| blue | hippocampus | PC(O-11:1(10E)/2:0)                                                                                                    | LC | LMGP01020146 |
| blue | hippocampus | PS(12:0/17:0)                                                                                                          | LC | LMGP03010050 |
| blue | hippocampus | PG(18:1(9Z)/0:0)                                                                                                       | LC | LMGP04050006 |
| blue | hippocampus | PA(14:0/12:0)                                                                                                          | LC | LMGP10010933 |
| blue | hippocampus | PA(P-18:0/20:5(5Z,8Z,11Z,14Z,17Z))                                                                                     | LC | LMGP10030050 |
| blue | hippocampus | Bisdemalonylmonardaecin                                                                                                | LC | LMPK12010041 |
| blue | hippocampus | 7-Hydroxyflavan                                                                                                        | LC | LMPK12020227 |
| blue | hippocampus | CerP(d18:1/18:0)                                                                                                       | LC | LMSP02050004 |
| blue | hippocampus | 9,11alpha-epoxypregn-4-ene-3,20-dione                                                                                  | LC | LMST02030160 |
| blue | hippocampus | 1alpha-hydroxy-26,27-dinorvitamin D3 25-carboxylic acid / 1alpha-hydroxy-26,27-dinorcholecalciferol 25-carboxylic acid | LC | LMST03020025 |
| blue | hippocampus | 1alpha,25-dihydroxy-21-nor-20-oxavitamin D3 / 1alpha,25-dihydroxy-21-nor-20-oxacholecalciferol                         | LC | LMST03020029 |
| blue | liver       | Creatinine                                                                                                             | GC | HMDB0000562  |
| blue | liver       | Betaine                                                                                                                | LC | HMDB000043   |
| blue | liver       | Pregnenolone                                                                                                           | LC | HMDB00253    |
| blue | liver       | PC(16:0/16:0)                                                                                                          | LC | HMDB00564    |
| blue | liver       | Pregnenolone sulfate                                                                                                   | LC | HMDB00774    |
| blue | liver       | Citrulline                                                                                                             | LC | HMDB00904    |
| blue | liver       | Pyridoxal                                                                                                              | LC | HMDB01545    |
| blue | liver       | Epinephrine sulfate                                                                                                    | LC | HMDB01876    |
| blue | liver       | m-Cresol                                                                                                               | LC | HMDB02048    |
| blue | liver       | 4-Heptanone                                                                                                            | LC | HMDB04814    |
| blue | liver       | DG(14:1(9Z)/22:6(4Z,7Z,10Z,13Z,16Z,19Z)/0:0)                                                                           | LC | HMDB07063    |

|      |       |                                                         |    |              |
|------|-------|---------------------------------------------------------|----|--------------|
| blue | liver | DG(20:4(5Z,8Z,11Z,14Z)/22:5(4Z,7Z,10Z,13Z,16Z)/0:0)     | LC | HMDB07525    |
| blue | liver | PC(18:0/22:5(7Z,10Z,13Z,16Z,19Z))                       | LC | HMDB08056    |
| blue | liver | PC(18:2(9Z,12Z)/20:5(5Z,8Z,11Z,14Z,17Z))                | LC | HMDB08149    |
| blue | liver | PE(14:0/P-18:0)                                         | LC | HMDB08851    |
| blue | liver | PE(22:5(4Z,7Z,10Z,13Z,16Z)/22:6(4Z,7Z,10Z,13Z,16Z,19Z)) | LC | HMDB09639    |
| blue | liver | PI(16:0/20:2(11Z,14Z))                                  | LC | HMDB09786    |
| blue | liver | PI(16:0/22:5(4Z,7Z,10Z,13Z,16Z))                        | LC | HMDB09795    |
| blue | liver | PG(16:0/22:4(7Z,10Z,13Z,16Z))                           | LC | HMDB10581    |
| blue | liver | PG(18:2(9Z,12Z)/22:6(4Z,7Z,10Z,13Z,16Z,19Z))            | LC | HMDB10659    |
| blue | liver | 2,5-dimethyl-2E-tridecenoic acid                        | LC | LMFA01020109 |
| blue | liver | beta-vinyl acrylic acid                                 | LC | LMFA01030099 |
| blue | liver | DHA (d5)                                                | LC | LMFA01030762 |
| blue | liver | 21-hydroxy-heneicosanoic acid                           | LC | LMFA01050076 |
| blue | liver | 2-hydroxy behenic                                       | LC | LMFA01050077 |
| blue | liver | Docosanedioic acid                                      | LC | LMFA01170037 |
| blue | liver | 6-[3]-ladderane-1-hexanol                               | LC | LMFA05000065 |
| blue | liver | 3,7,11,15-Tetramethyl-6,10,14-hexadecatrien-1-ol        | LC | LMFA05000210 |
| blue | liver | 2E,4E,6E-Nonatrienal                                    | LC | LMFA06000136 |
| blue | liver | N-methyl arachidonoyl amine                             | LC | LMFA08020007 |
| blue | liver | N-palmitoyl methionine                                  | LC | LMFA08020109 |
| blue | liver | 2E-Hexene                                               | LC | LMFA11000035 |
| blue | liver | (21-Methyl-8Z-pentatriacontene                          | LC | LMFA11000079 |
| blue | liver | 1-Heptene                                               | LC | LMFA11000319 |
| blue | liver | PC(16:0/5:0)                                            | LC | LMGP01010672 |

|      |                   |                                                                                                                                       |    |                |
|------|-------------------|---------------------------------------------------------------------------------------------------------------------------------------|----|----------------|
| blue | liver             | PS(O-16:0/22:6(4Z,7Z,10Z,13Z,16Z,19Z))                                                                                                | LC | LMGP03020088   |
| blue | liver             | PG(14:0/0:0)                                                                                                                          | LC | LMGP04050012   |
| blue | liver             | PI(P-18:0/19:1(9Z))                                                                                                                   | LC | LMGP06030046   |
| blue | liver             | PI(18:0/0:0)                                                                                                                          | LC | LMGP06050004   |
| blue | liver             | PI(20:3(8Z,11Z,14Z)/0:0)                                                                                                              | LC | LMGP06050021   |
| blue | liver             | 3,5-Di-O-methyl-8-prenylafzelechin-4beta-ol                                                                                           | LC | LMPK12020216   |
| blue | liver             | (+)-Myristinin A                                                                                                                      | LC | LMPK12020229   |
| blue | liver             | 4,2',4'-Trihydroxy-3-methoxydihydrochalcone                                                                                           | LC | LMPK12120458   |
| blue | liver             | Anastatin A                                                                                                                           | LC | LMPK12140273   |
| blue | liver             | dimethylallyl-diphosphate                                                                                                             | LC | LMPR01010001   |
| blue | liver             | (+)-Hirusten-12-oic acid                                                                                                              | LC | LMPR0103730002 |
| blue | liver             | 2-amino-14,16-dimethyloctadecan-3-ol                                                                                                  | LC | LMSP01080031   |
| blue | liver             | SM(d18:1/18:1(9Z))                                                                                                                    | LC | LMSP03010029   |
| blue | liver             | SM(d16:1/17:0)                                                                                                                        | LC | LMSP03010037   |
| blue | liver             | SM(d16:1/18:1)                                                                                                                        | LC | LMSP03010040   |
| blue | liver             | Cucurbitacin H                                                                                                                        | LC | LMST01010109   |
| blue | liver             | Stoloniferone F                                                                                                                       | LC | LMST01031092   |
| blue | liver             | Scillirosidin                                                                                                                         | LC | LMST01130002   |
| blue | liver             | 11alpha-(4-dimethylaminophenyl)-1alpha,25-dihydroxyvitamin D3 /<br>11alpha-(4-dimethylaminophenyl)-1alpha,25-dihydroxycholecalciferol | LC | LMST03020538   |
| blue | liver             | 3alpha,12alpha-Dihydroxy-6-oxo-5beta-chole-7-en-24-oic Acid                                                                           | LC | LMST04010405   |
| blue | prefrontal cortex | Adenosine                                                                                                                             | GC | HMDB0000050    |
| blue | prefrontal cortex | Glucose                                                                                                                               | GC | HMDB0000122    |

|      |                       |                                    |    |              |
|------|-----------------------|------------------------------------|----|--------------|
| blue | prefrontal corte<br>x | Malate                             | GC | HMDB0000156  |
| blue | prefrontal corte<br>x | Galactinol                         | GC | HMDB0005826  |
| blue | prefrontal corte<br>x | Glutathione                        | LC | HMDB00125    |
| blue | prefrontal corte<br>x | Norepinephrine                     | LC | HMDB00216    |
| blue | prefrontal corte<br>x | Retinoic acid                      | LC | HMDB01852    |
| blue | prefrontal corte<br>x | 10-oxo-docosanoic acid             | LC | LMFA01060139 |
| blue | prefrontal corte<br>x | PGE2alpha dimethyl amine           | LC | LMFA03010114 |
| blue | prefrontal corte<br>x | 14-methyl-8-hexadecen-1-ol         | LC | LMFA05000034 |
| blue | prefrontal corte<br>x | 9-pentadecen-1-ol                  | LC | LMFA05000050 |
| blue | prefrontal corte<br>x | 2-chlorohexadecanol                | LC | LMFA05000460 |
| blue | prefrontal corte<br>x | N-stearoyl GABA                    | LC | LMFA08020106 |
| blue | prefrontal corte<br>x | Anandamide (20:2, n-6)             | LC | LMFA08040002 |
| blue | prefrontal corte      | 3,7,11-Trimethyldodeca-2E,4E-diene | LC | LMFA11000045 |



|      |                       |                                                                                                    |    |              |
|------|-----------------------|----------------------------------------------------------------------------------------------------|----|--------------|
|      | x                     |                                                                                                    |    |              |
| blue | prefrontal corte<br>x | 3-O-alpha-L-rhamnopyranosyl-3-hydroxydecanoic acid                                                 | LC | LMFA13030003 |
| blue | prefrontal corte<br>x | PG(20:5(5Z,8Z,11Z,14Z,17Z)/0:0)                                                                    | LC | LMGP04050030 |
| blue | prefrontal corte<br>x | PI(20:1(11Z)/22:2(13Z,16Z))                                                                        | LC | LMGP06010523 |
| blue | prefrontal corte<br>x | Neomethymycin                                                                                      | LC | LMPK04000036 |
| blue | prefrontal corte<br>x | 3,4-Didehydro-beta-carotene                                                                        | LC | LMPR01070021 |
| blue | prefrontal corte<br>x | plastoquinol-1                                                                                     | LC | LMPR02010037 |
| blue | prefrontal corte<br>x | CerP(d18:1/18:0)                                                                                   | LC | LMSP02050004 |
| blue | prefrontal corte<br>x | 27-nor-22R-hydroxy-5alpha-cholestan-3,6-dione                                                      | LC | LMST01010334 |
| blue | prefrontal corte<br>x | 1alpha,24-dihydroxy-25,26,27-trinorvitamin D3 / 1alpha,24-dihydroxy-25,26,27-trinorcholecalciferol | LC | LMST03020023 |
| blue | prefrontal corte<br>x | 2,5-Dihydroxypyrazine                                                                              | GC | NA           |
| blue | prefrontal corte<br>x | Palatinitol                                                                                        | GC | NA           |
| blue | serum                 | Beta-Alanine                                                                                       | GC | HMDB0000056  |
| blue | serum                 | Serine                                                                                             | GC | HMDB0000187  |

|       |           |                                                                     |    |              |
|-------|-----------|---------------------------------------------------------------------|----|--------------|
| blue  | serum     | Arabitol                                                            | GC | HMDB0000568  |
| blue  | serum     | PC(16:0/P-18:1(11Z))                                                | LC | HMDB07996    |
| blue  | serum     | PC(20:5(5Z,8Z,11Z,14Z,17Z)/24:1(15Z))                               | LC | HMDB08520    |
| blue  | serum     | 18-nonadecynoic acid                                                | LC | LMFA01030503 |
| blue  | serum     | 2-hydroxy-tridecanoic acid                                          | LC | LMFA01050040 |
| blue  | serum     | PA(17:2(9Z,12Z)/0:0)                                                | LC | LMGP10050022 |
| blue  | serum     | Prebarbigerone                                                      | LC | LMPK12050072 |
| blue  | serum     | Muxiangrin III                                                      | LC | LMPK12111040 |
| blue  | serum     | Antiarone D                                                         | LC | LMPK12120273 |
| blue  | serum     | 5,7,3',4'-Tetrahydroxy-6,5'-di-C-prenylflavanone                    | LC | LMPK12140405 |
| blue  | serum     | Adonixanthin 3-glucoside                                            | LC | LMPR01070017 |
| blue  | serum     | 3-demethylubiquinone-9                                              | LC | LMPR02010036 |
| blue  | serum     | 19-norcholestenone                                                  | LC | LMST01010313 |
| blue  | serum     | 1,2,4-Benzenetriol                                                  | GC | METPA0328    |
| green | amygdala  | Phosphoenolpyruvate                                                 | GC | HMDB0000263  |
| green | amygdala  | 3-Sulfinoalanine                                                    | LC | HMDB00996    |
| green | intestine | 3-Hydroxybutyric Acid                                               | GC | HMDB0000357  |
| green | intestine | methyl 8-[2-(2-formyl-vinyl)-3-hydroxy-5-oxo-cyclopentyl]-octanoate | LC | LMFA01050151 |
| green | intestine | 5S,9S-Dimethyloctadecane                                            | LC | LMFA11000027 |
| green | intestine | PC(O-18:0/14:0)                                                     | LC | LMGP01020195 |
| green | feces     | octadecanol                                                         | GC | HMDB0002350  |
| green | feces     | Gama-Tocopherol                                                     | LC | HMDB01492    |
| green | feces     | Ceramide (d18:1/20:0)                                               | LC | HMDB04951    |
| green | feces     | Heneicosanedioic acid                                               | LC | LMFA01170036 |

|       |                   |                                                                                        |    |              |
|-------|-------------------|----------------------------------------------------------------------------------------|----|--------------|
| green | feces             | MG(18:0/0/0/0:0)[rac]                                                                  | LC | LMGL01010003 |
| green | feces             | PA(17:1(9Z)/22:2(13Z,16Z))                                                             | LC | LMGP10010273 |
| green | feces             | 3alpha,7beta,12alpha-Trihydroxy-6-oxo-5alpha-cholan-24-oic Acid                        | LC | LMST04010262 |
| green | hippocampus       | Inosine                                                                                | LC | HMDB00195    |
| green | hippocampus       | Eicosenoic acid                                                                        | LC | HMDB02231    |
| green | hippocampus       | DG(18:1(11Z)/22:5(4Z,7Z,10Z,13Z,16Z)/0:0)                                              | LC | HMDB07206    |
| green | hippocampus       | PC(15:0/22:6(4Z,7Z,10Z,13Z,16Z,19Z))                                                   | LC | HMDB07958    |
| green | hippocampus       | PC(20:4(5Z,8Z,11Z,14Z)/24:1(15Z))                                                      | LC | HMDB08454    |
| green | hippocampus       | PE(18:3(9Z,12Z,15Z)/20:2(11Z,14Z))                                                     | LC | HMDB09165    |
| green | hippocampus       | PE(P-18:1(11Z)/22:6(4Z,7Z,10Z,13Z,16Z,19Z))                                            | LC | HMDB11427    |
| green | hippocampus       | 20-carboxy-LTB4                                                                        | LC | LMFA03020016 |
| green | hippocampus       | 1-(6-[5]-ladderane-hexanyl)-2-(8-[3]-ladderane-octanyl)-sn-glycerol                    | LC | LMGL02030029 |
| green | hippocampus       | 1-tetradecanyl-2-(8-[3]-ladderane-octanyl)-sn-glycerol                                 | LC | LMGL02030032 |
| green | hippocampus       | 1-(8-[5]-ladderane-octanoyl)-2-(8-[3]-ladderane-octanyl)-sn-glycerophosphoethanolamine | LC | LMGP02080002 |
| green | hippocampus       | PS(17:0/20:3(8Z,11Z,14Z))                                                              | LC | LMGP03010241 |
| green | hippocampus       | PA(14:0/18:1(9Z))                                                                      | LC | LMGP10010019 |
| green | prefrontal cortex | N-Acetyl-5-Hydroxytryptamine                                                           | GC | HMDB0001238  |
| green | prefrontal cortex | Butylamine                                                                             | GC | HMDB0031321  |
| green | prefrontal cortex | Isochlorogenic Acid                                                                    | GC | NA           |
| green | serum             | PG(22:4(7Z,10Z,13Z,16Z)/0:0)                                                           | LC | LMGP04050017 |
| green | serum             | Caloxanthin sulfate                                                                    | LC | LMPR01070148 |
| green | serum             | Fumonisin A1                                                                           | LC | LMSP01080026 |

|        |           |                                                                                                                 |    |              |
|--------|-----------|-----------------------------------------------------------------------------------------------------------------|----|--------------|
| green  | serum     | 1beta,3alpha,7alpha,12alpha-Tetrahydroxy-5beta-cholan-24-oic Acid                                               | LC | LMST04010114 |
| yellow | intestine | Succinic Acid                                                                                                   | GC | HMDB0000254  |
| yellow | intestine | Cytosine                                                                                                        | LC | HMDB00630    |
| yellow | intestine | Linoleic acid                                                                                                   | LC | HMDB00673    |
| yellow | intestine | 1-Methylhistamine                                                                                               | LC | HMDB00898    |
| yellow | intestine | D-Sedoheptulose 7-phosphate                                                                                     | LC | HMDB01068    |
| yellow | intestine | LysoPC(18:1(9Z))                                                                                                | LC | HMDB02815    |
| yellow | intestine | LysoPC(16:1(9Z))                                                                                                | LC | HMDB10383    |
| yellow | intestine | LysoPC(22:4(7Z,10Z,13Z,16Z))                                                                                    | LC | HMDB10401    |
| yellow | intestine | Hydroxyphthioceranic acid (C42)                                                                                 | LC | LMFA01020327 |
| yellow | intestine | Tricosanyl palmitoleate                                                                                         | LC | LMFA07010027 |
| yellow | intestine | 14-O-(beta-D-glucopyranosyl)-7S,14R-dihydroxy-7,9,13,17-tetramethyl-2E,4E,8E,10E,12E,16E-octadecahexaenoic acid | LC | LMFA13010034 |
| yellow | intestine | PC(O-11:1(10E)/2:0)                                                                                             | LC | LMGP01020146 |
| yellow | intestine | PC(13:0/0:0)                                                                                                    | LC | LMGP01050001 |
| yellow | intestine | PC(17:1(10Z)/0:0)                                                                                               | LC | LMGP01050002 |
| yellow | intestine | PC(19:3(10Z,13Z,16Z)/0:0)                                                                                       | LC | LMGP01050003 |
| yellow | intestine | PC(15:1(9Z)/0:0)                                                                                                | LC | LMGP01050125 |
| yellow | intestine | PE(22:4(7Z,10Z,13Z,16Z)/0:0)                                                                                    | LC | LMGP02050014 |
| yellow | intestine | PE(20:1(11Z)/0:0)                                                                                               | LC | LMGP02050020 |
| yellow | intestine | PG(20:4(5Z,8Z,11Z,14Z)/0:0)                                                                                     | LC | LMGP04050010 |
| yellow | intestine | Peonidin                                                                                                        | LC | LMPK12010006 |
| yellow | intestine | Viscutin 1                                                                                                      | LC | LMPK12020265 |
| yellow | intestine | Dehydrodolineone                                                                                                | LC | LMPK12060060 |
| yellow | intestine | Pongamoside A                                                                                                   | LC | LMPK12110010 |

|        |           |                                                                          |    |              |
|--------|-----------|--------------------------------------------------------------------------|----|--------------|
| yellow | intestine | Isorhamnetin 3-(6''-galloylglucoside)                                    | LC | LMPK12110591 |
| yellow | intestine | Naringenin 7-O-(2'',6''-di-O-alpha-rhamnopyranosyl)-beta-glucopyranoside | LC | LMPK12140262 |
| yellow | intestine | 2-deoxy-20-hydroxy-5alpha-ecdysone 3-acetate                             | LC | LMST01010191 |
| yellow | intestine | 24-Nor-5beta-chole-22-ene-3alpha,7alpha,12alpha-triol                    | LC | LMST04060012 |
| yellow | feces     | 7-Dehydrocholesterol                                                     | LC | HMDB00032    |
| yellow | feces     | Dodecanoic acid                                                          | LC | HMDB00638    |
| yellow | feces     | PE(22:4(7Z,10Z,13Z,16Z)/0:0)                                             | LC | LMGP02050014 |
| yellow | feces     | Pelargonidin 3-sambubioside-5-glucoside                                  | LC | LMPK12010025 |
| yellow | serum     | Pseudouridine                                                            | LC | HMDB00767    |
